1 **Frequent Non-random Shifts in the Temporal Sequence of Developmental Landmark**

2 **Events during Fish Evolutionary Diversification**

3

4 **Authors**

5 Fumihito Ito<sup>1,2\*</sup>, Tomotaka Matsumoto<sup>2,3</sup>, Tatsumi Hirata<sup>2,4</sup>

6 <sup>1</sup>Genetic Strains Research Center, Mammalian Genetics Laboratory, National Institute of  
7 Genetics, Mishima, Shizuoka 411-8540, Japan

8 <sup>2</sup>Department of Genetics, The Graduate University for Advanced Studies (SOKENDAI),  
9 Mishima, Shizuoka 411-8540, Japan

10 <sup>3</sup>Department of Population Genetics, Division of Evolutionary Genetics, National Institute of  
11 Genetics, Yata 1111, Mishima, Shizuoka 411-8540, Japan.

12 <sup>4</sup>Department of Integrated Genetics, Division of Brain Function, National Institute of Genetics,  
13 Yata 1111, Mishima, Shizuoka 411-8540, Japan.

14

15 \*Correspondence author

16 Fumihito Ito, Mammalian Genetics Laboratory, National Institute of Genetics, Graduate  
17 University for Advanced Studies (Sokendai), Yata 1111, Mishima, Shizuoka 411-8540, Japan.

18 fumihito.0301@gmail.com

19

20

21 **Abstract**

22 Morphology is a consequence of sequentially occurring developmental events, termed a  
23 developmental sequence, and evolutionary changes in the sequence can generate morphological  
24 diversities. In this study, we examined evolutionary dynamics of the developmental sequence at a  
25 macro-evolutionary scale using the teleost fish. From the previous literature describing  
26 development of 31 fish species, we extracted the developmental sequences of 20 landmark events  
27 involving the whole body plan, and by using them, reconstructed ancestral developmental  
28 sequences. The phylogenetic comparisons of these sequences revealed event-dependent  
29 heterogeneity in the frequency of changing the sequences. We then determined potential event  
30 shifts that can parsimoniously explain the sequence changes on each node of the fish phylogenetic  
31 tree. These “heterochronic shifts” are widely distributed on almost of all the branches across the  
32 fish phylogeny. The simulation-based analysis indicated that this distribution of heterochronic  
33 shifts is not the result of random accumulation over phylogenetic time, but exhibits a curious  
34 constant trend so that individual phylogenetic branches harbor similar numbers of heterochronic  
35 shifts regardless of length. It is of great interest to know how these findings are related to  
36 morphological divergence in animals during evolution.

37

38 **Keywords**

39 developmental sequence, evolution, heterochronic shifts, parsimov, teleost fish

40

41 **1. Introduction**

42 The morphology of each multicellular organism is constructed by a fixed temporal sequence of  
43 developmental events, termed developmental sequence. Because development is an inherently

44 step-by-step process, one might assume that the temporal sequence is not readily changeable and  
45 is phylogenetically conserved among closely related species that share morphological  
46 characteristics. Along these lines, if an evolutionary change occurs in the developmental  
47 sequence, it could bring about a significant impact on animal body plan and lead to morphological  
48 diversities. Indeed, previous comparisons of developmental sequences have detected rare  
49 epoch-making changes that can provide morphological uniqueness to one species that is different  
50 from the others [1 - 3] supporting the idea that the developmental sequence is basically a  
51 conserved trait in the phylogenetic history.

52       Regarding evolution of the developmental sequences, another influential factor would be  
53 the phylotypic period [4]. This is the developmental time frame during which evolutionally  
54 distant animal species resemble each other in appearance. The well-accepted hourglass-like  
55 model defines the phylotypic period as the middle phase of ontogenic development, typically  
56 known as the pharyngular stage. Recent transcriptome analyses have indeed confirmed that  
57 inter-species diversities are kept to the minimum during this embryonic stage [5, 6], suggesting  
58 some unknown biological reasons underlying this curious regularity. Although the phylotypic  
59 period was originally proposed by the morphological resemblance, very few morphological  
60 analyses have actually been conducted on species similarities during the period.

61       To explore the role for the developmental sequence in animal morphological evolution,  
62 the critically missing information is empirical evaluation of evolutionary changes that had  
63 actually occurred in the developmental sequences. In particular, very few systematic comparisons  
64 have been made on the sequences of a wide range of developmental events that cover the whole  
65 body plan in any class of animals. Therefore, we have few clues about how commonly or rarely

66 the developmental sequences of these animals had changed during their evolutionary history. In  
67 the last several decades, comparative methods for developmental sequences have been developed  
68 by several groups [7 - 11]. These methods compare the relative order of developmental events  
69 among different species and successfully detected potential evolutionary shifts of the events in a  
70 parsimonious manner, namely “heterochronic shifts” in developmental sequences [12 – 16].  
71 Although most of these analyses have so far focused on the developmental sequences for a  
72 particular organ or limited body part, we considered that the methods themselves are similarly  
73 applicable to a global analysis of developmental sequences for the whole body plan.

74 In this study, we conducted a comprehensive survey of developmental sequences using  
75 teleost fish. The teleost fish is the largest group of vertebrates. Its abundant group members are  
76 characterized by great morphological diversities [17] and, at the same time, share the common  
77 characteristics of the fish body plan such as vertebrae, eyes, medial fins and swim bladders [18].  
78 Owing to the popularity as developmental research materials, there are well-established staging  
79 tables for many fish species that cover common clear-cut developmental landmarks. Hence, the  
80 teleost fish can provide an ideal dataset for systematic analyses of the early developmental  
81 sequences. Among the widely-used developmental landmarks, we chose 20 events that  
82 individually contribute to distinct body parts across the whole body plan. Using the dataset of 31  
83 different fish species, we compared the developmental sequences and reconstructed their  
84 ancestral sequences over the phylogenetic tree. Our analysis indicated that the developmental  
85 sequences are in fact frequently changeable during the course of evolution, and that these changes  
86 are associated with the two following characteristics. (1) The frequency of sequence changes  
87 differs widely depending on the developmental event. (2) Heterochronic shifts are not simply

88 accumulated along the phylogenetic time, but their number is kept more or less constant in  
89 individual phylogenetic branches regardless of length. We will discuss the potential implications  
90 of these findings.

91

## 92 **2. Materials and methods**

### 93 **(a) Construction of fish phylogenetic tree**

94 The overall topology of the phylogenetic tree followed the molecular phylogenetic relationship  
95 reported previously by Near et al. (2012, 2013) [19, 20]. The minor branches missing in the tree  
96 were inserted based on the phylogenetic data obtained from Saitoh et al. (2011) [21] and Yang et  
97 al. (2015) [22] for Cypriniformes, Perez et al. (2007) [23] and Friedman et al. (2013) [24] for  
98 Cichliformes, and Pohl et al. (2015) [25] for Cyprinodontiformes. The divergent times were  
99 determined using the public database TIMETREE, *The Timescale of Life* [26] (Supplemental  
100 file.1).

101

### 102 **(b) Data sampling**

103 Information about the temporal sequence of developmental events was extracted from 31  
104 published research articles that describe normal fish development (Figure 1) [27 - 57]. The 20  
105 developmental events used in this study were the first recognitions of blood circulation (bc),  
106 caudal fin ray (cfr), eye pigmentation (ep), embryonic shield (es), first somite (fs), hatch (h), heart  
107 beat/pulsing (hb), Kupffer's vesicle (kv), lens or lens placode/primodium (le), medial finfold  
108 (mff), mouth opening (mo), olfactory vesicle/pit/placode (olf), otolithes (oto), otic  
109 vesicle/placode/primodium (ot), optic vesicle/placode/primodium (op), pectoral fin bud (pfb),

110 swim bladder (sw), tail bud (tb), three brain regionalization (tbr), and tail lift from yolk (tl).  
111 According to information in the articles, temporal orders of the developmental events were  
112 ranked (Figure 1). When the article did not describe a developmental event, the event was treated  
113 as a missing datum.

114

### 115 **(c) Rank analyses of developmental events**

116 The raw ranks of individual developmental events were determined for the developmental  
117 sequences of extant fish (Figure 1) and the ancestral developmental sequences reconstructed as  
118 described below. The raw ranks were then normalized by the total number of the ranked events  
119 ( $r_{max}$ ) in each species, resulting in the relative scaling of the ranks in the range between  $1/r_{max}$   
120 and 1 in all the species [58]. To quantify variation of the ranks among the developmental  
121 sequences, pairwise distances in the ancestral ranks between all pairs of the sequences were  
122 summed and averaged for each pair of combinations.

123

### 124 **(d) Reconstruction of ancestral developmental sequences**

125 We used the event-pairing method developed by Jeffery et al. (2002) [8]. In brief, all of the 190  
126 pairs of developmental events in each species were scored based on the relative timing; when one  
127 event occurs earlier, simultaneously or later compared with another event, the timing was rated as  
128 0, 1, or 2, respectively. By comparing the scored event-pairing matrices of different species, the  
129 ancestral event-pairing matrix was reconstructed at each node of the fish phylogenetic tree in a  
130 parsimonious manner under accelerated transformation (acctran) and delayed transformation  
131 (deltran) optimizations using PAUP\* software [59]. The ancestral event-pairing matrices were

132 then re-converted to the ancestral developmental sequences (Supplemental file.2).

133

134 **(e) Detection of heterochronic shifts in fish phylogenetic tree**

135 The heterochronic shifts between two developmental sequences at each phylogenetic node were  
136 detected using the Parsimov algorithm developed by Jeffery et al. (2005) [9]. This  
137 parsimony-based algorithm determines the minimum number of event shifts that can explain the  
138 difference between two developmental sequences. Following the instructions, we implemented a  
139 Perl script, Parsimv7g.pl, with PAUP\* output log file in both acctran and deltran optimizations,  
140 and mapped the detected heterochronic shifts onto the fish phylogeny (Supplemental files 3).

141

142 **(f) Simulation-base analyses**

143 We examined whether the estimated number of heterochronic shifts in each branch can be simply  
144 explained by random accumulation in the phylogenetic tree. The simulation was based on a  
145 simple assumption that a heterochronic shift occurs at a constant rate per unit time and therefore,  
146 accumulates in proportion to branch length in the phylogenetic tree. In this simulation, we did not  
147 consider the event-dependent differences in the shift frequencies. The simulation randomly  
148 distributed the estimated heterochronic shifts over the fish phylogenic branches solely depending  
149 on their branch lengths. The simulation was replicated 100,000 times to obtain the expected  
150 distribution of heterochronic shifts in each branch under the assumption of random accumulation.  
151 The distribution of heterochronic shifts was then compared with the actual distribution of the  
152 hetrochronic shifts in the fish phylogenetic branches. In this study, we used year as the time scale  
153 of the branch length. However, in some analyses, we converted the time scale to generation by

154 considering the average generation times of individual fish species and confirmed the consistency  
155 of the results (Supplemental file 4).

156

### 157 **3. Results**

#### 158 **(a) Phylogenetic relationship of 31 fish**

159 For the present analyses, we used 30 teleost fish belonging to 13 distinct orders as the in-group,  
160 because the developmental sequences of these fish have been well-documented in previous  
161 articles (Figure 1). As an out-group, the amiadae fish, *Amia calva*, was used because it retains  
162 ancestral morphological characteristics and because a recent molecular analysis confirmed its  
163 location as the out-group of teleost fish [19]. In the constructed teleost phylogenetic tree, the  
164 examined fish species were widely distributed and represented distinct branches of teleost clade  
165 in a fairly unbiased manner (Figure 2). Because fish development in the marine environment has  
166 rarely been documented, the fish species covered in this study were basically freshwater fish, but  
167 also included several anadromous fish, such as *Gasterosteus aculeatus*, which develop in  
168 freshwater but migrate between the sea and freshwater in their adult life cycles.

169

#### 170 **(b) Comparison of temporal orders of developmental events among fish**

171 We selected 20 developmental events that consistently appeared as landmarks in the  
172 developmental staging of many fish species (Figure 1). For this selection, in the hope to gain a  
173 global picture of developmental sequences for the whole body plan, we intentionally included  
174 events that belong to substantially different biological systems and contexts; e.g., the ones that  
175 originate from different germ layers or that give rise to different cell types or separate body parts.



176 Additionally, the list also included a small number of seemingly interrelated events such as  
177 formations of optic vesicle/placode/primodium (op), lens/lens placode (le) and eye pigmentation  
178 (ep). We gathered information about these 20 events from the articles reporting the development  
179 of 31 fish, and ranked the orders of individual events in the temporal sequence for each species  
180 (Figure 1).

181 We first compared rank orders of each event among 30 in-group fish species. To  
182 minimize effects of simultaneous occurrence of events and missing data on the comparison, the  
183 raw ranks (Figure 1) were rescaled to normalized ranks that fit within the same range in all the  
184 fish species (see Methods). Figure 3a shows distribution of the normalized ranks for individual  
185 developmental events, which were horizontally arranged according to the average values.  
186 Interestingly, the ranges of variations in the rank widely differed depending on the event. One  
187 extreme case was embryonic shield (es), which always appeared first in the developmental  
188 sequences obtained from the 29 fish species with no variation, excluding one missing description  
189 in *Galaxias maculatus* (Figure 1). In contrast, relatively large variations in the rank were observed  
190 for the appearance of Kupffer's vesicle (kv), hatch (h), medial finfold (mff) and swim bladder (sb),  
191 suggesting that these events can more easily change their temporal orders in the developmental  
192 sequence (Figure 3a).

193 To explore the evolutionary history of developmental sequences, we next  
194 reconstructed ancestral developmental sequences at each node of the phylogenetic branches by  
195 using the event-pairing method [8]. This algorithm compares the relative orders of all the event  
196 pairs between two different developmental sequences and generates the ancestral sequences  
197 determined as a parsimonious solution under acctran and deltran optimizations (Supplemental file

198 2). Using the obtained ancestral developmental sequences, we compared the normalized ranks of  
199 individual events as we did in Figure 3a. Overall, the rank orders of individual events in the  
200 ancestral developmental sequences (Figure 3b and 3c) were quite similar to those in the extant  
201 fish sequences (Figure 3a); when the developmental events were horizontally aligned in the same  
202 order of the extant average ranks, there were only a few inversions in the order of two successive  
203 events at the average level (e.g., the order between first somite (fs) and tail bud (tb)). Because this  
204 sequence reconstitution was based on parsimony, the variations of estimated ranks were kept to  
205 nearly minimum. Still, individual events exhibited a similar trend of rank variations to that  
206 observed in the extant fish sequences, further confirming the idea that some developmental events  
207 change their orders more frequently than the others during evolution.

208           Because the rank seemed to fluctuate depending on the event, we more systematically  
209 analyzed the size of variations of the ranks. As an index of rank changeability, the pairwise rank  
210 distances between all pairs of the ancestral developmental sequences were measured and  
211 represented as the average value for each pair (Figure 4). Comparable values were obtained by  
212 acctran and deltran optimizations (Spearman's rank correlation for the two optimizations;  $r =$   
213 0.839). When the events were temporally arranged along the standard ontogenic time frame  
214 defined as the average rank orders in the extant fish, the rank changeability was found to be  
215 squeezed in the middle phase of the developmental sequence, involving three brain  
216 regionalizations (tbr), otic vesicle/placode/primodium (ot) and lens or lens placode/primodium  
217 (le) (Figure 4). The medial finfold (mff) around late-tail bud stage, in contrast, recorded the  
218 largest rank changeability.

219           We then focused on the actual sequence of developmental events. Figure 5 shows the

220 percentage of the sequences in which one event (shown in row) occurs later than another (shown  
221 in column) among the 30 extant in-group fish. In general, the sequence of two temporally distant  
222 events was quite conservative, with no reversal in the order in many combinations, whereas the  
223 neighboring events more frequently change their orders. If a closer look was given to the  
224 sequence of anatomically interrelated events, the temporal order of the optic  
225 vesicle/placode/primodium (op) and the lens/lens placode (le) was fixed in all the fish species,  
226 and that of the lens/lens placode (le) and the eye pigmentation (ep) was almost fixed except for  
227 one sequence reversal in *Heterobranchus bidorsalis*. Another interesting trend was about the  
228 timing of hatch (h), which often changed the orders with the three late events, mouth opening  
229 (mo), swim bladder (sb) and caudal fin ray (cfr). Similar results were obtained from the  
230 comparison of event orders in ancestral developmental sequences (Supplemental figure 1).

231

### 232 **(c) Distribution of heterochronic shifts across the fish phylogenetic tree**

233 Using the widely-used Parsimov algorithm [9], we next searched for heterochronic shifts of the  
234 events that can explain the changes from one sequence to another at every node of the fish  
235 phylogenetic tree. Although this is a parsimony-based algorithm and therefore estimates the  
236 minimum number of event shifts, we detected 184 (acctrans), 179 (deltrans) and 94 (conserved  
237 between acctrans and deltrans) heterochronic shifts in total (Supplemental file 3). The fish  
238 phylogenetic tree has 60 branches in total. When the detected shifts were mapped over the  
239 phylogenetic tree, multiple heterochronic shifts were observed on almost all the branches (Figure  
240 2, Supplemental file 3). For example, in the relatively long branch of order Salmoniformes, five  
241 and three heterochronic shifts were detected by acctrans and deltrans optimizations, respectively.

242           Because a substantial number of heterochronic shifts were detected widely across the  
243 fish phylogeny, we wondered whether these shifts might happen rather frequently and be  
244 randomly accumulated over the evolutionary history. To address this question, we took a  
245 simulation-based approach. Given that a heterochronic shift occurs at a random stochastic  
246 manner and is neutrally accumulated, we simulated the expected distribution of the number of  
247 heterochronic shifts, of which the number was nearly proportional to the phylogenetic branch  
248 length (white circles in Figure 6a and 6b). By contrast, the actual distribution of heterochronic  
249 shifts detected by the Parsimov analysis was much more constant, regardless of the branch  
250 length in both acctran and deltran optimizations (black circles in Figure 6a and 6b). Coefficient  
251 of variation of the number of heterochronic shifts across the branches also showed smaller  
252 values for the experimental dataset than for the simulation data (Figure 6c), indicating that  
253 branch-by-branch fluctuations of the number of heterochronic shifts are actually more limited  
254 compared with the values expected under simulation. In addition, the number of the  
255 phylogenetic branches that harbored no heterochronic shifts was significantly smaller for the  
256 experimental dataset than that for the simulation data (Figure 6d). Because inclusion of an  
257 extremely long branch could skew the statistical results, we performed the same statistical  
258 comparison using only relatively short branches ( $\leq 50\text{Mya}$  and  $\leq 20\text{Mya}$ ). These analyses again  
259 showed similar results, indicating that the number of heterochronic shifts per branch is more  
260 constant than the expectation under the assumption of random accumulation (Figure 6c, 6d, and  
261 Supplemental figure 2). Replacing the phylogenetic time scale with the generation number  
262 basically did not qualitatively affect the results of the analyses (Supplemental figures 3 and 4).

263           The heterochronic shifts of developmental events are sometimes associated to

264 differentiation of terminal phenotypes [60]. Thus, we examined the topological distribution of  
265 the heterochronic shifts by separately examining internal and terminal branches. In both of the  
266 branch types, the numbers of actual heterochronic shifts were basically in the range of the  
267 expected numbers in the simulation (Figure 6e and 6f). Significant differences were only  
268 exceptionally observed in the all branch category under the acctran optimization; however, we  
269 cannot rule out the possibility that the inclusion of extremely long branches in this category  
270 affected the results. In conclusion, this analysis did not positively support a preferential  
271 occurrence of heretochronic shifts in either the external or internal branches.

272

#### 273 **4. Discussion**

274 The present study provides empirical evidence that developmental sequences are in fact  
275 changeable during evolution; the extant fish species clearly involve historic signs showing that  
276 their ancestors had experienced dynamic and frequent rearrangement of the developmental  
277 sequences. This finding may not be exactly concordant with the traditional view that the  
278 developmental sequence is a phylogenetically conserved trait, which provides the blueprint for  
279 the common body plan among related species. One reason is probably our wide selection of  
280 developmental events; we intentionally took up the events that cover a whole variety of  
281 embryonic origins, cell types, body parts and biological systems, aiming for understanding the  
282 global body plan. In contrast, the major focus of previous studies was in-depth understanding of  
283 developmental sequences for a restricted body part or organ [61 - 63]. Therefore, even though  
284 we only analyzed one group of species that share the highly conserved body plan, rather  
285 frequent shifts of the events could be observed. There is increasing evidence for modular control

286 of formation of different body parts [64 - 66]. This modular nature of individual body parts can  
287 underlie the large fluctuations of developmental sequences observed in this study, and possibly  
288 contribute to individual evolution of different body parts toward morphological diversification.

289         Although the heterochronic shifts detected in this study are widespread across fish  
290 phylogeny, our simulation-based analyses uncovered certain regularity in the distribution.  
291 Namely, the shifts are not randomly accumulated over the evolutionary time, but there appears  
292 to be some force making the number of shifts constant in individual phylogenetic branches.  
293 Currently, we cannot effectively interpret this perplexing result, and only note two potential  
294 scenarios from different angles, which are not necessarily mutually exclusive. First, it may be  
295 possible that the heterochronic shift is a branching-related process. If a new branch often comes  
296 with new shifts, then the shift number should be more correlated with the branch number rather  
297 than its length. If speciation processes are concerned, this is actually a very attractive scenario,  
298 because the heterochronic shift can support differentiation of branch-specific phenotypes in  
299 each species. Second, the seeming constancy of the shift number might be related to the limited  
300 configuration of acceptable developmental sequences. Our event sequence analyses indeed  
301 showed that only certain types of changes are acceptable in the developmental sequences  
302 (Figure 5). This limitation probably stems from both developmental and evolutionary  
303 constraints in order to construct a fit functional body plan. Yet, for the moment, we cannot  
304 determine how the limitation of sequence configurations can shape the distribution of potential  
305 heterochronic shifts, because they are limited, but still a great many acceptable sequences exist.

306         One interesting finding of this study is that some developmental events change their  
307 temporal orders more drastically than others during evolution. Of particular note is the

308 emergence of medial finfold (mff), of which rank changeability was the highest among all the  
309 events (Figure 4). The medial finfold is a morphogenetic field for fins. A recent study reports  
310 that this single morphogenetic field actually is a mosaic composed of three distinct fin primordia  
311 [67]. Thus, it is possible that the three primordia behaved as independent modules during  
312 evolution, thereby expanding the temporal range of this event. Another interesting example is  
313 the timing of hatch (h), which is relatively easily changeable with the three following  
314 developmental events, mouth opening (mo), swim bladder (sb) and caudal fin ray (cfr). All  
315 these events are directly related to the life strategy of how a fish survives during the larval stage,  
316 and therefore changing the orders may be advantageous under some circumstances, particularly  
317 when fish have to adapt to a new environment [68]. Indeed, the temporal shift of birth timing  
318 has been regarded as a symbolic example of “heterochrony”, an evolutionary force based on  
319 maneuvering developmental machinery [69 - 72].

320         When the developmental events were aligned along the ontogenetic sequence, the rank  
321 changeability was squeezed in the middle phase of the early development involving three brain  
322 regionalization (tbr), otic placode/primodium (ot), and lens formation (le) (Figure 4). These  
323 events are typical characteristics of the conserved phylotypic stage defined by the hourglass  
324 model [73, 74]. The hourglass model has been gaining increasing support from the recent  
325 transcriptome analyses but still lacks sufficient evidence from objective morphological analyses.  
326 Although the relationship between the developmental sequences and morphological similarity is  
327 not very straightforward, our results seem to provide another support for the hourglass model  
328 from the morphological point of view.

329         There is a common observation that the external temperature affects developmental

330 time frames [66, 75]. Because most fish reproduce by external fertilization and the embryos  
331 develop under fluctuating temperatures, temporal shifts of individual developmental events  
332 might sometimes occur in fish under the natural environment. Indeed, a study reports that the  
333 developmental sequence is polymorphic even in one fish species [76]. Thus, fish may be  
334 relatively tolerant to sporadic shifts of developmental events in the natural ontogeny, and  
335 frequent encounters with such situations somehow increase the chances that some fish adopt a  
336 shift in a persistent manner. Currently, it is not clear whether such fish-specific circumstances  
337 are reflected in the present results. Future systematic analyses using other groups of animals  
338 will address this issue.  
339



340 **Reference**

- 341 1. Strauss R.E. 1990 Heterochronic Variation in the Developmental Timing of Cranial  
342 Ossifications in Poeciliid Fishes (Cyprinodontiformes). *Evolution* **44**(6), 1558-1567.  
343 (doi:10.1111/j.1558-5646.1990.tb03846.x).  
344
- 345 2. Jeffery J.E., Richardson M.K., Coates M.I., Bininda-Emonds O.R. 2002 Analyzing  
346 developmental sequences within a phylogenetic framework. *Syst Biol* **51**(3), 478-491.  
347 (doi:10.1080/10635150290069904).  
348
- 349 3. Maxwell E.E., Harrison L.B., Larsson H.C. 2010 Assessing the phylogenetic utility of  
350 sequence heterochrony: evolution of avian ossification sequences as a case study. *Zoology*  
351 (*Jena*) **113**(1), 57-66. (doi:10.1016/j.zool.2009.06.002).  
352
- 353 4. Duboule D. 1994 Temporal colinearity and the phylotypic progression: a basis for the  
354 stability of a vertebrate Bauplan and the evolution of morphologies through heterochrony.  
355 *Dev Suppl*, 135-142.  
356
- 357 5. Kalinka A.T., Varga K.M., Gerrard D.T., Preibisch S., Corcoran D.L., Jarrells J., Ohler U.,  
358 Bergman C.M., Tomancak P. 2010 Gene expression divergence recapitulates the  
359 developmental hourglass model. *Nature* **468**(7325), 811-814. (doi:10.1038/nature09634).  
360

- 361 6. Irie N., Kuratani S. 2011 Comparative transcriptome analysis reveals vertebrate phylotypic  
362 period during organogenesis. *Nat Commun* **2**, 248. (doi:10.1038/ncomms1248).  
363
- 364 7. Nunn C.L., Smith K.K. 1998 Statistical analyses of developmental sequences: the  
365 craniofacial region in marsupial and placental mammals. *Am Nat* **152**(1), 82-101.  
366 (doi:10.1086/286151).  
367
- 368 8. Jeffery J.E., Bininda-Emonds O.R., Coates M.I., Richardson M.K. 2002 Analyzing  
369 evolutionary patterns in amniote embryonic development. *Evol Dev* **4**(4), 292-302. (doi:  
370 10.1046/j.1525-142X.2002.02018.x).  
371
- 372 9. Jeffery J.E., Bininda-Emonds O.R., Coates M.I., Richardson M.K. 2005 A new technique  
373 for identifying sequence heterochrony. *Syst Biol* **54**(2), 230-240.  
374 (doi:10.1080/10635150590923227).  
375
- 376 10. Harrison L.B., Larsson H.C. 2008 Estimating evolution of temporal sequence changes: a  
377 practical approach to inferring ancestral developmental sequences and sequence  
378 heterochrony. *Syst Biol* **57**(3), 378-387. (doi:10.1080/10635150802164421).  
379
- 380 11. Germain D., Laurin M. 2009 Evolution of ossification sequences in salamanders and  
381 urodele origins assessed through event-pairing and new methods. *Evol Dev* **11**(2), 170-190.  
382 (doi:10.1111/j.1525-142X.2009.00318.x).

- 383 12. Schoch R.R. 2006 Skull ontogeny: developmental patterns of fishes conserved across  
384 major tetrapod clades. *Evol Dev* **8**(6), 524-536. (doi:10.1111/j.1525-142X.2006.00125.x).  
385
- 386 13. Smirthwaite J.J., Rundle S.D., Bininda-Emonds O.R., Spicer J.I. 2007 An integrative  
387 approach identifies developmental sequence heterochronies in freshwater  
388 basommatophoran snails. *Evol Dev* **9**(2), 122-130.  
389 (doi:10.1111/j.1525-142X.2007.00143.x).  
390
- 391 14. Sanchez-Villagra M.R., Goswami A., Weisbecker V., Mock O., Kuratani S. 2008  
392 Conserved relative timing of cranial ossification patterns in early mammalian evolution.  
393 *Evol Dev* **10**(5), 519-530. (doi:10.1111/j.1525-142X.2008.00267.x).  
394
- 395 15. Laurin M. 2014 Assessment of modularity in the urodele skull: an exploratory analysis  
396 using ossification sequence data. *J Exp Zool B Mol Dev Evol* **322**(8), 567-585.  
397 (doi:10.1002/jez.b.22575).  
398
- 399 16. Carril J., Tambussi C.P. 2017 Skeletogenesis of *Myiopsitta monachus* (Psittaciformes) and  
400 sequence heterochronies in Aves. *Evol Dev* **19**(1), 17-28. (doi:10.1111/ede.12211).  
401
- 402 17. Nelson J.S, Grande T.C, Wilson M.V.H. 2016 *Fishes of the world*. New York: Wiley.  
403

- 404 18. Romer, A. S. & Parsons, T. S. 1986 *The vertebrate body*. Philadelphia, PA: Saunders  
405 College Publications.
- 406
- 407 19. Near T.J., Eytan R.I., Dornburg A., Kuhn K.L., Moore J.A., Davis M.P., Wainwright P.C.,  
408 Friedman M., Smith W.L. 2012 Resolution of ray-finned fish phylogeny and timing of  
409 diversification. *Proc Natl Acad Sci U S A* **109**(34), 13698-13703.  
410 (doi:10.1073/pnas.1206625109).
- 411
- 412 20. Near T.J., Dornburg A., Eytan R.I., Keck B.P., Smith W.L., Kuhn K.L., Moore J.A., Price  
413 S.A., Burbrink F.T., Friedman M., et al. 2013 Phylogeny and tempo of diversification in  
414 the superradiation of spiny-rayed fishes. *Proc Natl Acad Sci U S A* **110**(31), 12738-12743.  
415 (doi:10.1073/pnas.1304661110).
- 416
- 417 21. Saitoh K, Sado T, Doosey MH, Bart Jr HL, Inoue JG, Nishida M, Mayden RL, Miya M.  
418 2011 Evidence from mitochondrial genomics supports the lower Mesozoic of South Asia  
419 as the time and place of basal divergence of cypriniform fishes (Actinopterygii:  
420 Ostariophysi). *Zool J Linn Soc* **161**(3), 633 – 662. (doi:10.1111/j.1096-3642.2010.  
421 00651.x).
- 422
- 423 22. Yang L., Sado T., Vincent Hirt M., Pasco-Viel E., Arunachalam M., Li J., Wang X.,  
424 Freyhof J., Saitoh K., Simons A.M., et al. 2015 Phylogeny and polyploidy: resolving the  
425 classification of cyprinine fishes (Teleostei: Cypriniformes). *Mol Phylogenet Evol* **85**,

- 426 97-116. (doi:10.1016/j.ympev.2015.01.014).
- 427
- 428 23. Perez G.A., Rican O., Orti G., Bermingham E., Doadrio I., Zardoya R. 2007 Phylogeny  
429 and biogeography of 91 species of heroine cichlids (Teleostei: Cichlidae) based on  
430 sequences of the cytochrome b gene. *Mol Phylogenet Evol* **43**(1), 91-110.  
431 (doi:10.1016/j.ympev.2006.08.012).
- 432
- 433 24. Friedman M., Keck B.P., Dornburg A., Eytan R.I., Martin C.H., Hulsey C.D., Wainwright  
434 P.C., Near T.J. 2013 Molecular and fossil evidence place the origin of cichlid fishes long  
435 after Gondwanan rifting. *Proc Biol Sci* **280**(1770), 20131733.  
436 (doi:10.1098/rspb.2013.1733).
- 437
- 438 25. Pohl M., Milvertz F.C., Meyer A., Vences M. 2015. Multigene phylogeny of  
439 cyprinodontiform fishes suggests continental radiations and a rogue taxon position of  
440 Pantanodon. *Verteb Zool* **65** (1), 37-44.
- 441
- 442 26. Hedges, S. B. & Kumar, S. 2009 *The timetree of life*. New York, NY: Oxford University  
443 Press.
- 444
- 445 27. Ballard W.W., 1986 Morphogenetic movements and a provisional fate map of  
446 development in the holostean fish, *Amia calva*. *J Exp Zool*. **238**(3), 355–372.  
447 (doi:10.1002/jez.1402380308).

448

449 28. Shardo JD. 1995. Comparative embryology of teleostean fishes. I. Development and  
450 staging of the American shad, *Alosa sapidissima* (Wilson, 1811). *J Morph* **225**(2):  
451 125–167. (doi:10.1002/jmor.1052250202).

452

453 29. Long W.L, Ballard W.W. 1976 Normal Embryonic Stages of the White Sucker,  
454 *Catostomus commersoni*. *Copeia* **1976** (2), 342-351. (doi. 10.2307/1443957).

455

456 30. Kimmel C.B., Ballard W.W., Kimmel S.R., Ullmann B., Schilling T.F. 1995 Stages of  
457 embryonic development of the zebrafish. *Dev Dyn* **203**(3), 253-310.  
458 (doi:10.1002/aja.1002030302).

459

460 31. Verma, P., 1970 Normal stages in the development of *Cyprinus carpio* var. *communis* L.  
461 *Acta Biol Acad Sci Hung* **21**(2), 207-218.

462

463 32. Tsai H.Y., Chang M., Liu S.C., Abe G., Ota K.G. 2013 Embryonic development of  
464 goldfish (*Carassius auratus*): a model for the study of evolutionary change in  
465 developmental mechanisms by artificial selection. *Dev Dyn* **242**(11), 1262-1283.  
466 (doi:10.1002/dvdy.24022).

467

- 468 33. Basak S.K., Basak B., Gupta N., Haque M.M., Amin R. 2014 Embryonic and larval  
469 development of silver barb (*Barodes gonionotus*) in an mobile hatchery under laboratory  
470 Condition. *Euro Sci J Special ed* **3**, 258-270.  
471
- 472 34. Puvaneswari S., Marimuthu K., Karuppasamy R., Haniffa M.A., 2009 Early embryonic  
473 and larval development of Indian catfish, *Heteropneustes fossilis*. *Eur Asia J Bio Sci* **3**,  
474 84-96.( doi: 10.5053/ejobios.2009.3.0.12).  
475
- 476 35. Olaniyi W.A., Omitogun O.G. 2014 Embryonic and larval developmental stages of  
477 African giant catfish *Heterobranchus bidorsalis* (Geoffroy Saint Hilaire, 1809) (Teleostei,  
478 Clariidae). *Springerplus* **3**, 677. (doi:10.1186/2193-1801-3-677).  
479
- 480 36. Ballard W.W., 1973 Normal embryonic stages for salmonid fishes, based on *Salmo*  
481 *gairdneri* Richardson and *Salvelinus fontinalis* (Mitchill). *J Exp Zool* **184**(1), 7–26. (doi:  
482 10.1002/jez.1401840103).  
483
- 484 37. Pelluet D. 1944 Criteria for the recognition of development stages in the salmon ( *Salmo*  
485 *salar* ). *J Morph* **74**(3), 395-407.(doi: 10.1002/jmor.1050740305).  
486
- 487 38. Benzie V. 1968 Stages in the normal development of *Galaxias maculatus attenuatus*  
488 (Jenyns). *NZ J Mar Freshw Res* **2**(4), 606–627.  
489

- 490 39. Hall T.E., Smith P., Johnston I.A., 2004 Stages of Embryonic Developmsnt in the Atlantic  
491 Cod *Gadus morhua*. *J Morphol* **259**(3), 255-270. (doi: 10.1002/jmor.10222).  
492
- 493 40. Ballard W.W., 1969 Normal embryonic stages of *Gobius niger jozo*. *Pubbl Staz Zool Napoli*  
494 **37**, 1-17.  
495
- 496 41. Arakawa T., Kanno Y., Akiyama N., Kitano T., Nakatsuji N., Nakatsuji T., 1999 Stages of  
497 embryonic development of the ice goby (shiro-uo), *Leucopsarion petersii*. *Zool Sci* **16**(5),  
498 761–773.(doi.org/10.2108/zsj.16.761).  
499
- 500 42. Swarup, H. 1958 Stages of development of the stickleback *Gasterosteus aculeatus*. *J*  
501 *Embryol Exp Morphol* **6**(3), 373–383.  
502
- 503 43. McElman J.F., Balon E.K., 1979 Early ontogeny of walleye, *Stizostedion vitreum*, with  
504 steps of saltatory development. *Environ Biol Fish* **4**(4), 309–348.  
505
- 506 44. Marimuthu K., Haniffa M.A., 2007 Embryonic and Larval Development of the Striped  
507 Snakehead *Channa striatus*. *Taiwania* **52**(1), 84-92. ( dio:10.6165/tai).  
508
- 509 45. Zalina I., Saad C.R., Christianus A., Harmin, S.A. 2012 Induced breeding and embryonic  
510 development of climbing perch (*Anabas testudineus*, Bloch). *J Fish Aquat Sci.* **7**(5),  
511 291–306. (doi.org/10.5567/ECOLOGY-IK.2013.8.14.).



512

513 46. Kratochwil C.F., Sefton M.M., Meyer A. 2015 Embryonic and larval development in the  
514 Midas cichlid fish species flock (*Amphilophus spp.*): a new evo-devo model for the  
515 investigation of adaptive novelties and species differences. *BMC Dev Biol* **15**, 12.  
516 (doi:10.1186/s12861-015-0061-1).

517

518 47. Meijide F.J., Guerrero G.A., 2000 Embryonic and larval development of a  
519 substrate-brooding cichlid *Cichlasoma dimerus* (Heckel, 1840) under laboratory  
520 conditions. *J Zool* **252**(2), 481–493. (doi: 10.1111/j.1469-7998.2000.tb01231.x).

521

522 48. Fujimura K., Okada N. 2007 Development of the embryo, larva and early juvenile of Nile  
523 tilapia *Oreochromis niloticus* (Pisces: Cichlidae). Developmental staging system. *Dev*  
524 *Growth Differ* **49**(4), 301-324. (doi:10.1111/j.1440-169X.2007.00926.x).

525

526 49. Balon, E. K. 1977 Early ontogeny of *Labeotropheus* Ahl, 1927 (Mbuna, Cichlidae, Lake  
527 Malawi), with a discussion on advanced protective styles in fish reproduction and  
528 development. *Environ Biol Fish* **2**(2), 147–176.

529

530 50. de Jong I.M., Witte F., Richardson M.K. 2009 Developmental stages until hatching of the  
531 Lake Victoria cichlid *Haplochromis piceatus* (Teleostei: Cichlidae). *J Morphol* **270**(5),  
532 519-535. (doi:10.1002/jmor.10716).

533

- 534 51. Humphrey C., Klumpp D.W., Pearson R. 2003. Early development and growth of the east  
535 rainbowfish, *Melanotaenia splendida splendida*. *Mar Freshwater Res* **53**(1), 17–25.(doi:  
536 org/10.1071/MF02037).
- 537
- 538 52. Cunningham J.E.R., Balon E.K. 1985 Early ontogeny of *Adinia xenica* (Pisces,  
539 Cyprinodontiformes): 1. The development of embryos in hiding. *Environ Biol Fish* **14**(2-3),  
540 115–166.
- 541
- 542 53. Armstrong P.B., Child J.S., 1965 Stages in normal development of *Fundulus heteroclitus*.  
543 *Biol Bull* **128**(2), 143–168. (doi:10.2307/1539545).
- 544
- 545 54. Tavalga W.N., Rugh R. 1947 Development of the platyfish, *Platypoecilus maculatus*. *Zool*  
546 *Sci Contrib N Y Zool Soc* **32**(1-8), 1-15.
- 547
- 548 55. Wourms J.P., 1972 Developmental biology of annual fishes. I. Stages in the normal  
549 development of *Austrofundulus myersi* Dahl. *J Exp Zool* **182**(2), 143 – 167.  
550 (doi:10.1002/jez.1401820202).
- 551
- 552 56. Iwamatsu T., Hirata K., 1984 Normal course of development of the Java medaka, *Oryzias*  
553 *javanicus*. *Bull Aichi Univ Edu (Nat Sci)* **33**, 87–109.
- 554

- 555 57. Iwamatsu T. 2004 Stages of normal development in the medaka *Oryzias latipes*. *Mech Dev*  
556 **121**(7-8), 605-618. (doi:10.1016/j.mod.2004.03.012).
- 557
- 558 58. Weisbecker V., Goswami A., Wroe S., Sanchez-Villagra M.R. 2008 Ossification  
559 heterochrony in the therian postcranial skeleton and the marsupial-placental dichotomy.  
560 *Evolution* **62**(8), 2027-2041. (doi:10.1111/j.1558-5646.2008.00424.x).
- 561
- 562 59. Swofford, D. L. 2002 PAUP\*. *Phylogenetic Analysis Using Parsimony ( \*and other*  
563 *methods)*, v. 4beta10. Sunderland, MA: Sinauer.
- 564
- 565 60. Gunter H.M., Koppermann C., Meyer A. 2014 Revisiting de Beer's textbook example of  
566 heterochrony and jaw elongation in fish: calmodulin expression reflects heterochronic  
567 growth, and underlies morphological innovation in the jaws of belonoid fishes. *Evodevo*  
568 **5**(1), 8. (doi:10.1186/2041-9139-5-8).
- 569
- 570 61. Schlosser G. 2008 Development of the retinotectal system in the direct-developing frog  
571 *Eleutherodactylus coqui* in comparison with other anurans. *Front Zool* **5**, 9.  
572 (doi:10.1186/1742-9994-5-9).
- 573
- 574 62. Hautier L., Weisbecker V., Goswami A., Knight F., Kardjilov N., Asher R.J. 2011 Skeletal  
575 ossification and sequence heterochrony in xenarthran evolution. *Evol Dev* **13**(5), 460-476.  
576 (doi:10.1111/j.1525-142X.2011.00503.x).

577

578 63. Workman A.D., Charvet C.J., Clancy B., Darlington R.B., Finlay B.L. 2013 Modeling  
579 transformations of neurodevelopmental sequences across mammalian species. *J Neurosci*  
580 **33**(17), 7368-7383. (doi:10.1523/JNEUROSCI.5746-12.2013).

581

582 64. Klingenberg C.P., Badyaev A.V., Sowry S.M., Beckwith N.J. 2001 Inferring  
583 developmental modularity from morphological integration: analysis of individual variation  
584 and asymmetry in bumblebee wings. *Am Nat* **157**(1), 11-23. (doi:10.1086/317002).

585

586 65. Kawanishi T., Kaneko T., Moriyama Y., Kinoshita M., Yokoi H., Suzuki T., Shimada A.,  
587 Takeda H. 2013 Modular development of the teleost trunk along the dorsoventral axis and  
588 *zic1/zic4* as selector genes in the dorsal module. *Development* **140**(7), 1486-1496.

589

(doi:10.1242/dev.088567).

590

591 66. Schmidt K., Starck J.M. 2010 Developmental plasticity, modularity, and heterochrony  
592 during the phylotypic stage of the zebra fish, *Danio rerio*. *J Exp Zool B Mol Dev Evol*  
593 **314**(2), 166-178. (doi:10.1002/jez.b.21320).

594

595 67. Larouche O., Zelditch M.L., Cloutier R. 2017 Fin modules: an evolutionary perspective on  
596 appendage disparity in basal vertebrates. *BMC Biol* **15**(1), 32.

597

(doi:10.1186/s12915-017-0370-x).

598

- 599 68. Miller B.S., Kendall A.W. 2009 *Early life history of marine fishes*. Berkeley, Calif.,  
600 University of California Press; xii, 364 p. p.  
601
- 602 69. Keyte A., Smith K.K. 2012 Heterochrony in somitogenesis rate in a model marsupial,  
603 *Monodelphis domestica*. *Evol Dev* **14**(1), 93-103.  
604 (doi:10.1111/j.1525-142X.2011.00524.x).  
605
- 606 70. Dial T.R., Reznick D.N., Brainerd E.L. 2017 Heterochrony in the evolution of Trinidadian  
607 guppy offspring size: maturation along a uniform ontogenetic trajectory. *Proc Biol Sci*  
608 **284**(1864), (doi:10.1098/rspb.2017.1319).  
609
- 610 71. Botelho J.F., Smith-Paredes D., Vargas A.O., 2015 Altriciality and the Evolution of Toe  
611 Orientation in Birds. *J Evol Biol* **42**(4),  
612 502-510. (doi: .org/10.1007/s11692-015-9334-7).  
613
- 614 72. Werneburg I., Laurin M., Koyabu D., Sanchez-Villagra M.R. 2016 Evolution of  
615 organogenesis and the origin of altriciality in mammals. *Evol Dev* **18**(4), 229-244.  
616 (doi:10.1111/ede.12194).  
617
- 618 73. Richardson M.K. 1995 Heterochrony and the phylotypic period. *Dev Biol* **172**(2), 412-421.  
619 (doi:10.1006/dbio.1995.8041).  
620

621 74. Irie N. 2017 Remaining questions related to the hourglass model in vertebrate evolution.

622 *Curr Opin Genet Dev* **45**, 103-107. (doi:10.1016/j.gde.2017.04.004).

623

624 75. Mabee P.M., Olmstead K.L., Cabbage C.C. 2000 An experimental study of intraspecific  
625 variation, developmental timing, and heterochrony in fishes. *Evolution* **54**(6), 2091-2106.

626

627 76. de Jong I.M., Colbert M.W., Witte F., Richardson M.K. 2009 Polymorphism in  
628 developmental timing: intraspecific heterochrony in a Lake Victoria cichlid. *Evol Dev*  
629 **11**(6), 625-635. (doi:10.1111/j.1525-142X.2009.00370.x).

630

### 631 **Author contribution**

632 F.I. designed the study, performed the majority of the experiments, analyzed data and wrote the  
633 manuscript. T.M contributed to designing and conducting the simulation. T.M. and T.H.  
634 supervised the study and helped F.I. to write the manuscript with input from other people.

635

### 636 **Competing interests**

637 The authors have no competing interests.

638

### 639 **Acknowledgements**

640 We thank Dr. Toshihiko Shiroishi, Dr. Yasushi Hiromi, Dr. Naoki Irie, Dr. Takanori Amano, Dr.  
641 Yuuta Moriyama and Dr. Kousuke Mouri for comments that helped greatly improve the  
642 manuscript. We also thank Dr. Erin E. Maxwell and Dr. Luke B. Harrison for their advice on  
643 parsimony analyses.

644 **Figure Legends**

645

646 **Figure 1. Temporal orders of developmental events in the 31 fish**

647 The temporal sequence of developmental events was extracted from the reference listed for each  
648 species. Abbreviations of developmental events are; bc: blood circulation, cfr: caudal fin ray, ep:  
649 eye pigmentation, es: embryonic shield, fs: first somite, h: hatch, hb: heart beat/pulsing, kv:  
650 kupffer's vesicle, le: lens or lens placode/primodium, mff: medial finfold, mo: mouth opening,  
651 olf: olfactory vesicle/pit/placode, oto: otolithes, ot: otic vesicle placode/primodium, op: optic  
652 vesicle/placode/primodium, pfb: pectoral fin bud, sw: swim bladder, tb: tail bud, tbr: three brain  
653 regionalization, and tl: tail lift from yolk. The ranks of missing data are marked by ?.

654

655 **Figure 2. Phylogenetic relationships of the 31 fish**

656 The phylogenetic tree of the 31 fish examined in this study. The asterisk marks the anadromous  
657 fish, while all the others are freshwater fish. The numbers aside the branches indicate the  
658 divergent times (Mya). In some representative branches, the numbers of heterochronic shifts  
659 detected under acctran and deltran optimizations are shown in boxes.

660

661 **Figure 3. Distribution of ranks of events in the developmental sequence**

662 The boxplot shows the statistical distribution (minimum, first quartile, median, third quartile,  
663 maximum and outliers) of normalized ranks for individual developmental events obtained from  
664 the extant in-group 30 fish data (a) and reconstructed ancestral developmental sequences by  
665 acctran (b) and deltran (c) optimizations. In all of the panels, the developmental events are

666 horizontally aligned from left to right according to average ranks in the extant fish sequences. In  
667 the ancestral sequences (b, c), the average sequence is reversed between first somite (fs) and tail  
668 bud (tb), between heart beats (hb) and olfactory vesicle/pit/placode (olf), and between blood  
669 circulation (bc) and otolithes (oto). An additional inversion is observed between swim bladder  
670 (sb) and caudal fin rays (cfr) in the deltran optimization (c).

671

#### 672 **Figure 4. Rank changeability of individual developmental events**

673 The variation of the ranks is shown as the average value of pairwise rank distances, which are  
674 calculated from all the pairs of ancestral developmental sequences reconstructed under acctran  
675 (left) and deltran (right) optimizations. The events are arranged along the standard ontogenic  
676 time frame defined by the average developmental sequence in extant fish (Figure 2) from top to  
677 bottom. \*significant differences ( $P < 0.05$ ) by Mann-Whitney U-test when comparing the values  
678 of Kupffer's vesicle (kv) and three brain regionalization (tbr) and those of lens formation (le)  
679 and tail lift from yolk (tl).

680

#### 681 **Figure 5. Sequence orders of event pairs in extant developmental sequences**

682 The event sequence matrix represents all the pairwise combinations of developmental events.  
683 The number shows the percentage of the sequences in which the row event occurs later than the  
684 column event, and was calculated from the dataset of extant 30 fish excluding the missing event  
685 data. The individual cells are differently heatmap color-coded depending on the percentage.

686

#### 687 **Figure 6. Distribution of heterochronic shifts in the fish phylogeny**



688 (a,b) The relationship between the phylogenetic branch length and the number of heterochronic  
689 shifts detected from the extant and ancestral developmental sequences (black circle) and  
690 theoretically estimated by simulation (open circle) under acctran (a) and deltran (b)  
691 optimizations. In the simulation, the branch length and the number of shifts are highly  
692 correlated (Spearman's rank correlation coefficients; 0.9995 (acctran), 0.9995 (deltran)). (c) The  
693 coefficient of variance for the number of heterochronic shifts in each branch. The black and  
694 open circles show the experimental and simulated values, respectively. The vertical bars indicate  
695 95% confident intervals for the simulated value. The analysis was conducted with three different  
696 branch categories: all branches, and the branches shorter than 50 and 20 million years (Mys). (d)  
697 The number of branches with no heterochronic shifts calculated from experimental (black  
698 circle) and simulation data (open circle) in three different branch length categories. Vertical bars  
699 indicate 95% confident intervals of the simulated value. (e, f) The number of heterochronic  
700 shifts detected in the external (e) and internal (f) branches calculated from experimental (black  
701 circle) and simulation data (open circle). The branches are categorized into three groups  
702 according to their lengths. Vertical bars indicate 95% confident intervals of the simulated value.

| Taxon                             | Common name              | Reference                                                                                                     | Ranks of events |    |    |    |    |     |    |    |    |    |     |     |     |    |     |    |    |    |    |     |
|-----------------------------------|--------------------------|---------------------------------------------------------------------------------------------------------------|-----------------|----|----|----|----|-----|----|----|----|----|-----|-----|-----|----|-----|----|----|----|----|-----|
|                                   |                          |                                                                                                               | es              | op | fs | tb | kv | tbr | ot | le | tl | hb | olf | mff | oto | bc | pfb | ep | h  | mo | sb | cfr |
| <i>Amia calva</i>                 | Bowfins                  | Ballard, 1986 [27]                                                                                            | 1               | 2  | 2  | 2  | ?  | 3   | 4  | 5  | 5  | 5  | 5   | 6   | 8   | 7  | 7   | 7  | 10 | 8  | 9  | 9   |
| <i>Alosa sapidissima</i>          | American shad            | Shardo, 1995 [28]                                                                                             | 1               | 4  | 2  | 5  | ?  | 3   | 5  | 5  | 6  | 7  | 5   | 6   | 7   | 7  | 7   | 8  | 10 | 9  | ?  | 11  |
| <i>Catostomus commersoni</i>      | White sucker             | Long and Ballard, 1976 [29]                                                                                   | 1               | 3  | 2  | 3  | 4  | 3   | 4  | 5  | 5  | 6  | 7   | 6   | 7   | 7  | 8   | 8  | 8  | 10 | 11 | 9   |
| <i>Danio rerio</i>                | Zebrafish                | Kimmel et al., 1995 [30]                                                                                      | 1               | 4  | 3  | 2  | 4  | 5   | 5  | 6  | 5  | 8  | 7   | 7   | 7   | 9  | 9   | 8  | 11 | 12 | 10 | 12  |
| <i>Cyprinus carpio</i>            | Common carp              | Yamamoto et al., 1979 [31]                                                                                    | 1               | 3  | 1  | 2  | ?  | 3   | 4  | 5  | 5  | 5  | 7   | 7   | 7   | 7  | 7   | 8  | 8  | 10 | 11 | 11  |
| <i>Carassius auratus</i>          | Mudminnow                | Faal et al., 2008 [32]                                                                                        | 1               | 3  | 1  | 2  | ?  | 3   | 4  | 5  | 5  | 5  | 7   | 7   | 7   | 7  | 7   | 8  | 8  | 10 | 11 | 11  |
| <i>Barbodes gonionotus</i>        | Silver barb              | not certified by peer review) is the author/funder. All rights reserved. No reuse allowed without permission. | 1               | 3  | 1  | 2  | ?  | 3   | 4  | 5  | 5  | 5  | 7   | 7   | 7   | 7  | 7   | 8  | 8  | 10 | 11 | 11  |
| <i>Heteropneustes fossilis</i>    | Stinging catfish         | Puvaneswari et al., 2009 [34]                                                                                 | 1               | 2  | 2  | 2  | 4  | 3   | 6  | 4  | 4  | 5  | 5   | 4   | ?   | 7  | 9   | 8  | 7  | 10 | ?  | 8   |
| <i>Heterobranchius bidorsalis</i> | African catfish          | Olaniyi and Omitogbe, 2014 [35]                                                                               | 1               | 2  | 2  | 2  | 3  | 7   | 4  | 8  | 4  | 5  | 8   | 7   | 4   | 8  | 7   | 5  | 6  | 9  | ?  | 10  |
| <i>Oncorhynchus mykiss</i>        | Rainbow trout            | Ballard, 1973 [36]                                                                                            | 1               | 3  | 2  | 7  | 2  | 3   | 7  | 5  | 6  | 6  | 4   | 7   | 9   | 7  | 7   | 8  | 12 | 10 | ?  | 11  |
| <i>Salmo salar</i>                | Atlantic salmon          | Pelluet, 1944, Gorodilov, 1996 [37]                                                                           | 1               | 3  | 2  | 6  | 2  | 7   | 4  | 5  | ?  | 7  | 8   | 8   | 9   | 10 | 12  | 6  | 13 | 11 |    |     |
| <i>Galaxias maculatus</i>         | Common galaxias          | Benzie, 1968 [38]                                                                                             | ?               | 1  | 2  | 1  | 2  | 1   | 3  | 2  | 5  | 2  | 3   | 7   | 8   | 7  | 6   | 4  | 10 | 10 | ?  | 9   |
| <i>Gadus morhua</i>               | Atlantic cod             | Hall et al., 2004 [39]                                                                                        | 1               | 2  | 1  | 3  | 3  | 4   | 6  | ?  | 7  | 7  | 5   | 4   | 5   | 8  | 8   | 9  | 10 | 12 | 11 | 11  |
| <i>Gobius niger</i>               | Black goby               | Ballard, 1969 [40]                                                                                            | 1               | 2  | 2  | 3  | 3  | 6   | 5  | 4  | 4  | 8  | ?   | 5   | 7   | 9  | 8   | 8  | 10 | 11 | 9  | 12  |
| <i>Leucopsarion petersii</i>      | Ice goby                 | Arakawa et al., 1999 [41]                                                                                     | 1               | 3  | 3  | 2  | 3  | 4   | 5  | 6  | 5  | 7  | ?   | ?   | 9   | 8  | 10  | 8  | 13 | 11 | 12 | ?   |
| <i>Gasterosteus aculeatus</i>     | Three-spined stickleback | Swarup, 1958 [42]                                                                                             | 1               | 3  | 4  | ?  | 5  | 2   | 5  | 5  | ?  | 6  | 6   | ?   | 6   | 8  | 9   | 7  | 11 | 10 | 12 | 12  |
| <i>Stizostedion vitreum</i>       | Walleye                  | McElman and Balon, 1979 [43]                                                                                  | 1               | 2  | 3  | 2  | 3  | 4   | 4  | 5  | 6  | 7  | 4   | 6   | 8   | 9  | 11  | 10 | 13 | 14 | 15 | 12  |
| <i>Channa striatus</i>            | Striped snakehead        | Marimuthu and Haniffa, 2007 [44]                                                                              | 1               | 2  | 2  | 2  | 4  | 3   | 3  | 4  | 4  | 5  | 5   | 4   | 6   | 5  | 7   | ?  | 6  | 8  | 7  | 9   |
| <i>Anabas testudineus</i>         | Climbing gouramies       | Zalina et al., 2012 [45]                                                                                      | 1               | 3  | 4  | ?  | 2  | 4   | 4  | 5  | ?  | 6  | ?   | ?   | 7   | 7  | ?   | 10 | 8  | 9  | 9  | 11  |
| <i>Amphilophus xiloensis</i>      | Cichlids                 | Kratochwil et al., 2015 [46]                                                                                  | 1               | 2  | 2  | 2  | ?  | 5   | 2  | 4  | 3  | 5  | ?   | ?   | 7   | 8  | 8   | 6  | 9  | 11 | 10 |     |
| <i>Cichlasoma dimerus</i>         | South American cichlids  | Mejide and Guerrero, 2000 [47]                                                                                | 1               | 4  | 3  | 2  | ?  | 5   | 5  | 5  | 6  | 5  | ?   | 8   | 6   | 9  | 8   | 7  | 10 | ?  | 10 |     |
| <i>Oreochromis niloticus</i>      | Nile tilapia             | Fujimura and Okada, 2007 [48]                                                                                 | 1               | 3  | 2  | 3  | ?  | 4   | 5  | 6  | 5  | 6  | 6   | 7   | 8   | 8  | 8   | 9  | 10 | 12 | 11 |     |
| <i>Labetrophorus trewavasae</i>   | Scrapemouth mbuna        | Balon, 1977 [49]                                                                                              | 1               | 2  | 4  | 3  | ?  | 2   | 3  | 5  | 5  | 6  | 11  | 9   | 5   | 7  | 9   | 8  | 10 | 12 | 14 | 13  |
| <i>Haplochromis piceatus</i>      | Victoria cichlids        | de Jong et al., 2009 [50]                                                                                     | 1               | 2  | 2  | 4  | ?  | 4   | 3  | 4  | 5  | 5  | 4   | 6   | 6   | 6  | 7   | 7  | 8  | 9  | 6  | 9   |
| <i>Melanotaenia splendide</i>     | Eastern rainbow fish     | Humphrey et al., 2003 [51]                                                                                    | 1               | 2  | 4  | 3  | ?  | 6   | 5  | 6  | 7  | ?  | 11  | 8   | 7   | 9  | 5   | 12 | 11 | 10 | 13 |     |
| <i>Adinia xenica</i>              | Diamond killifish        | Cunningham and Balon, 1985 [52]                                                                               | 1               | 2  | 3  | 7  | 3  | 2   | 3  | 5  | ?  | 6  | 8   | 9   | 4   | 7  | 8   | 9  | 13 | 12 | 11 | 10  |
| <i>Fundulus heteroclitus</i>      | Mummichog                | Armstrong and Swope Child, 1965 [53]                                                                          | 1               | 2  | 4  | 7  | 3  | 3   | 5  | 5  | ?  | 6  | 5   | ?   | 8   | 7  | 9   | 10 | 12 | 12 | 11 |     |
| <i>Xiphophorus maculatus</i>      | Southern platyfish       | Tavolga and Rugh [54]                                                                                         | 1               | 2  | 2  | 4  | 7  | 3   | 3  | 5  | 4  | 5  | 6   | ?   | 8   | 6  | 5   | 7  | 11 | 10 | ?  | 9   |
| <i>Austrofundulus myersi</i>      | Rivulines                | Wourms, 1998 [55]                                                                                             | 1               | 4  | 3  | 2  | 2  | 5   | 6  | 7  | 10 | 7  | ?   | 11  | 9   | 8  | 9   | 10 | 14 | 13 | 11 | 12  |
| <i>Oryzias latipes</i>            | Japanese ricefish        | Iwamatsu and Hirata, 1984 [56]                                                                                | 1               | 3  | 4  | ?  | 2  | 5   | 4  | 6  | 9  | 7  | 13  | 12  | 8   | 8  | 10  | 11 | 17 | 15 | 14 | 16  |
| <i>Oryzias javanicus</i>          | Javanese ricefish        | Iwamatsu, 2004 [57]                                                                                           | 1               | 3  | 4  | ?  | 2  | 5   | 5  | 6  | 9  | 7  | 7   | ?   | 8   | 8  | 9   | 10 | 14 | 13 | 11 | 12  |

Figure 1.

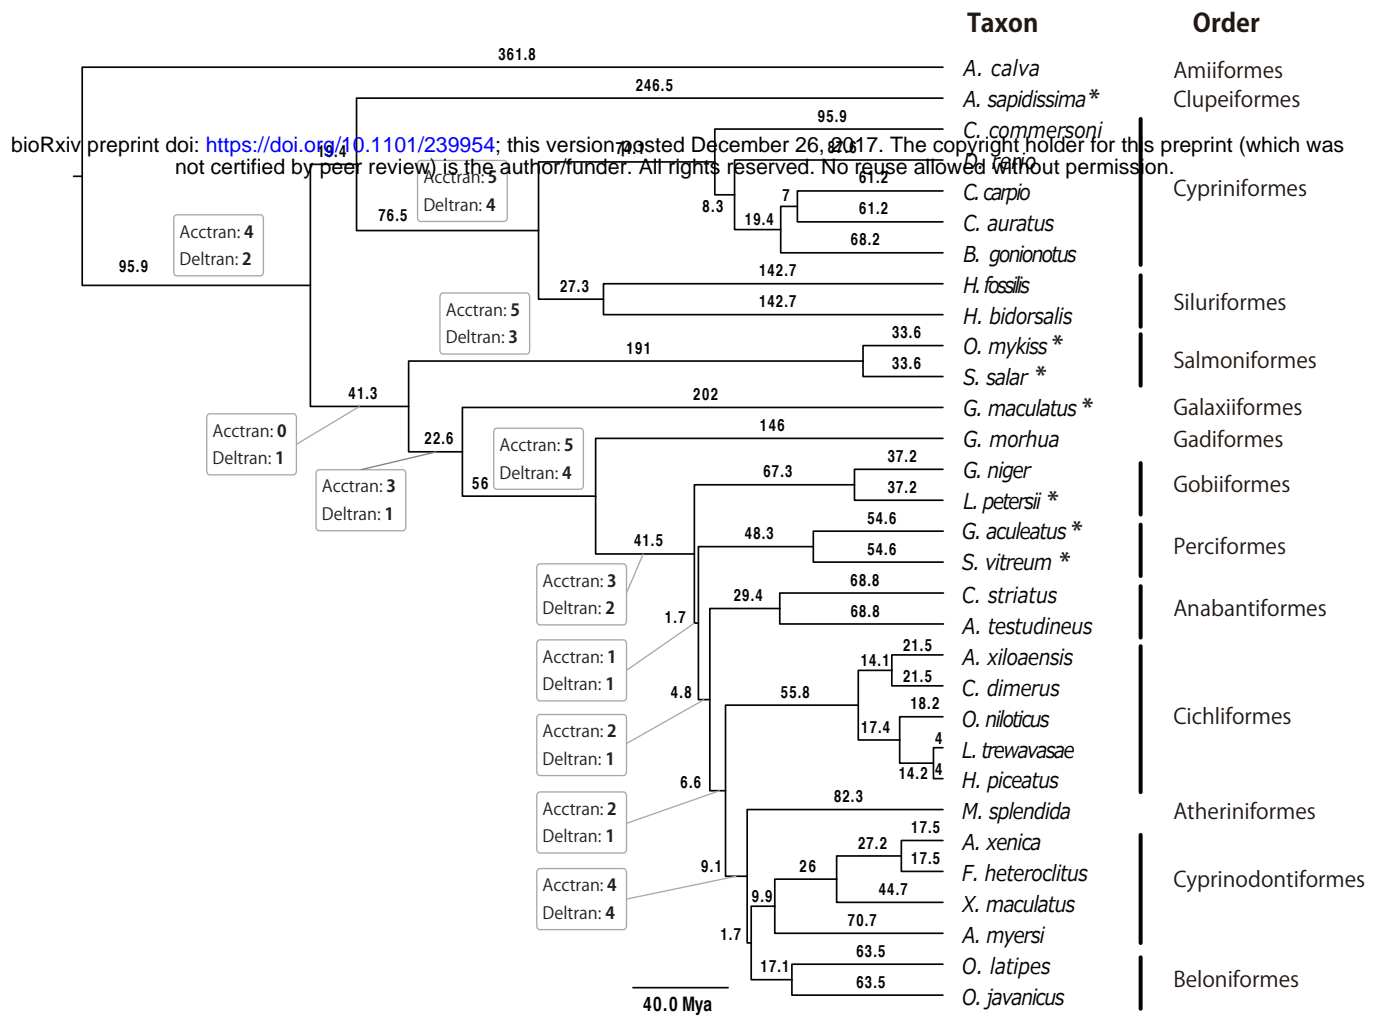

Figure 2.

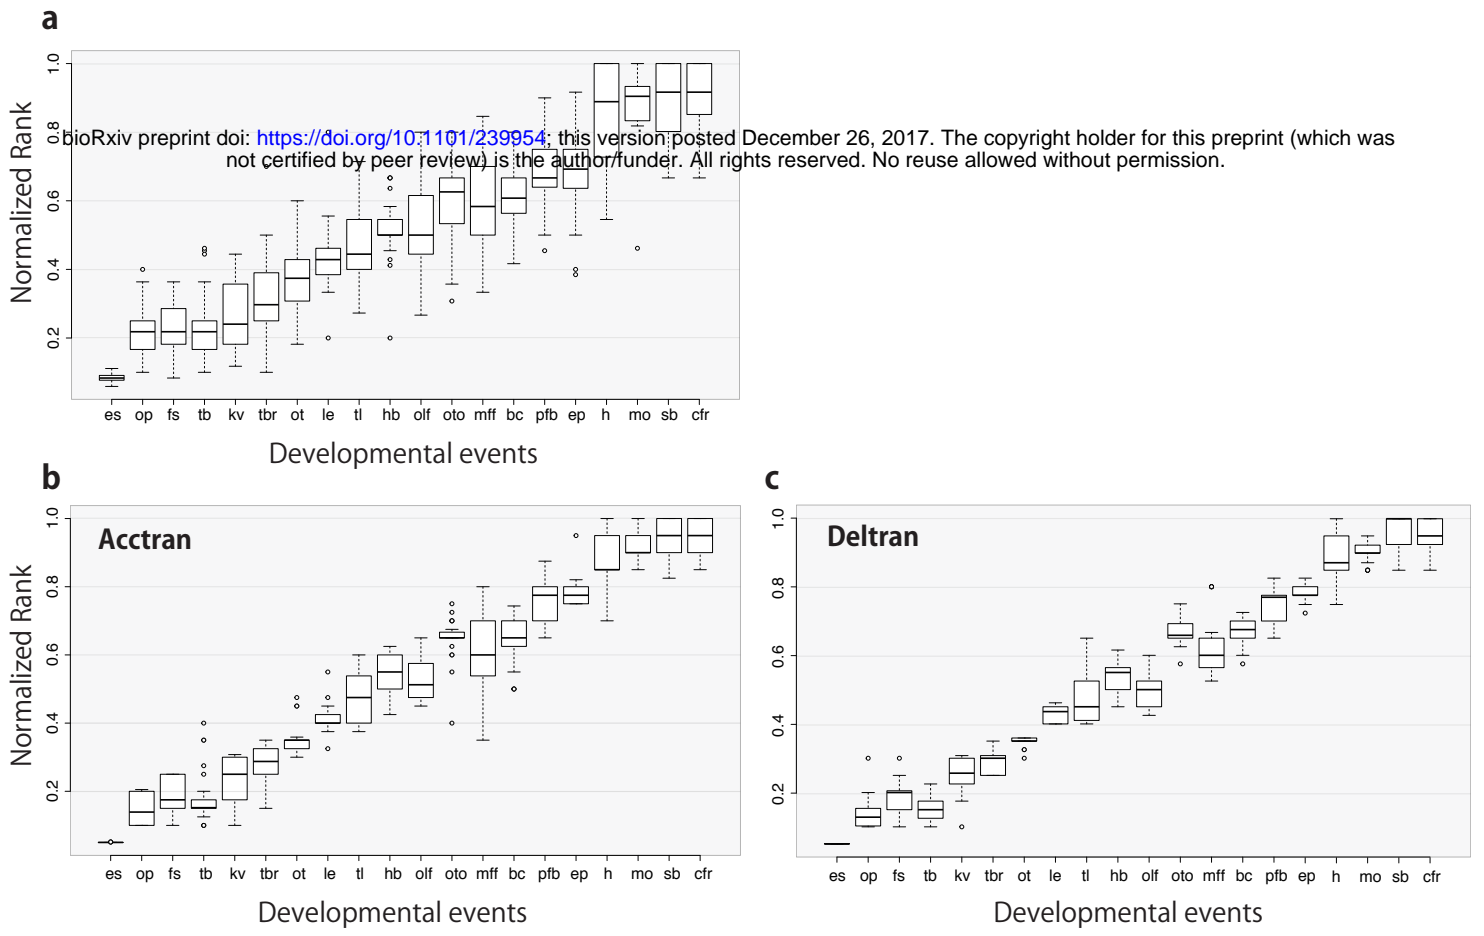

**Figure 3.**

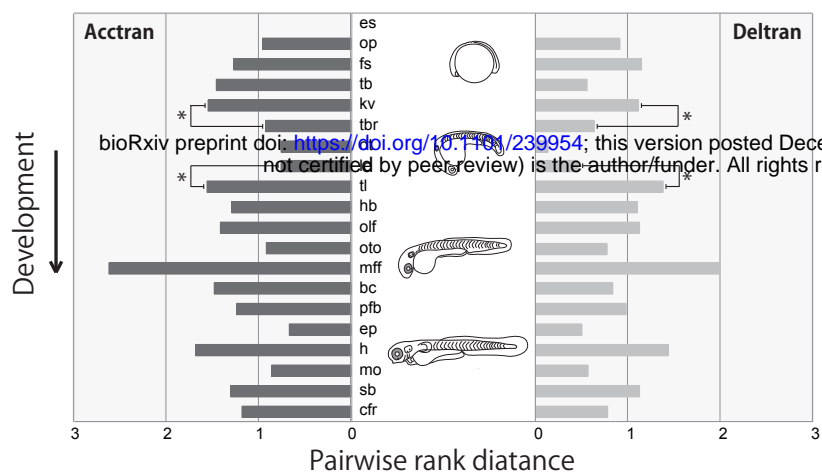

**Figure 4.**

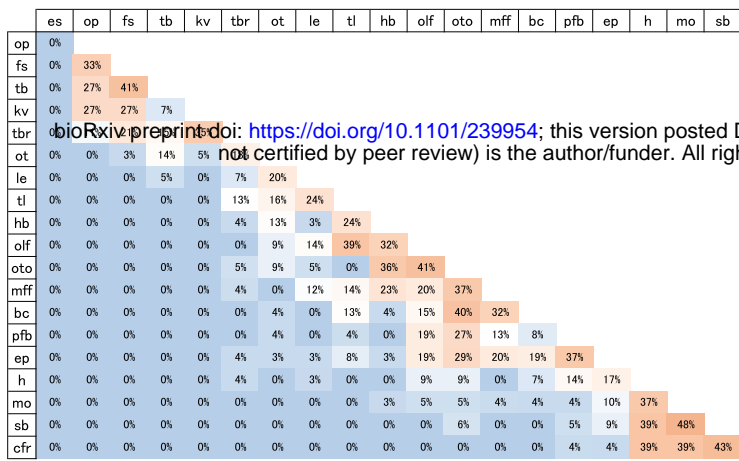

bioRxiv preprint doi: <https://doi.org/10.1101/239954>; this version posted December 26, 2017. The copyright holder for this preprint (which was not certified by peer review) is the author/funder. All rights reserved. No reuse allowed without permission.

Figure 5.

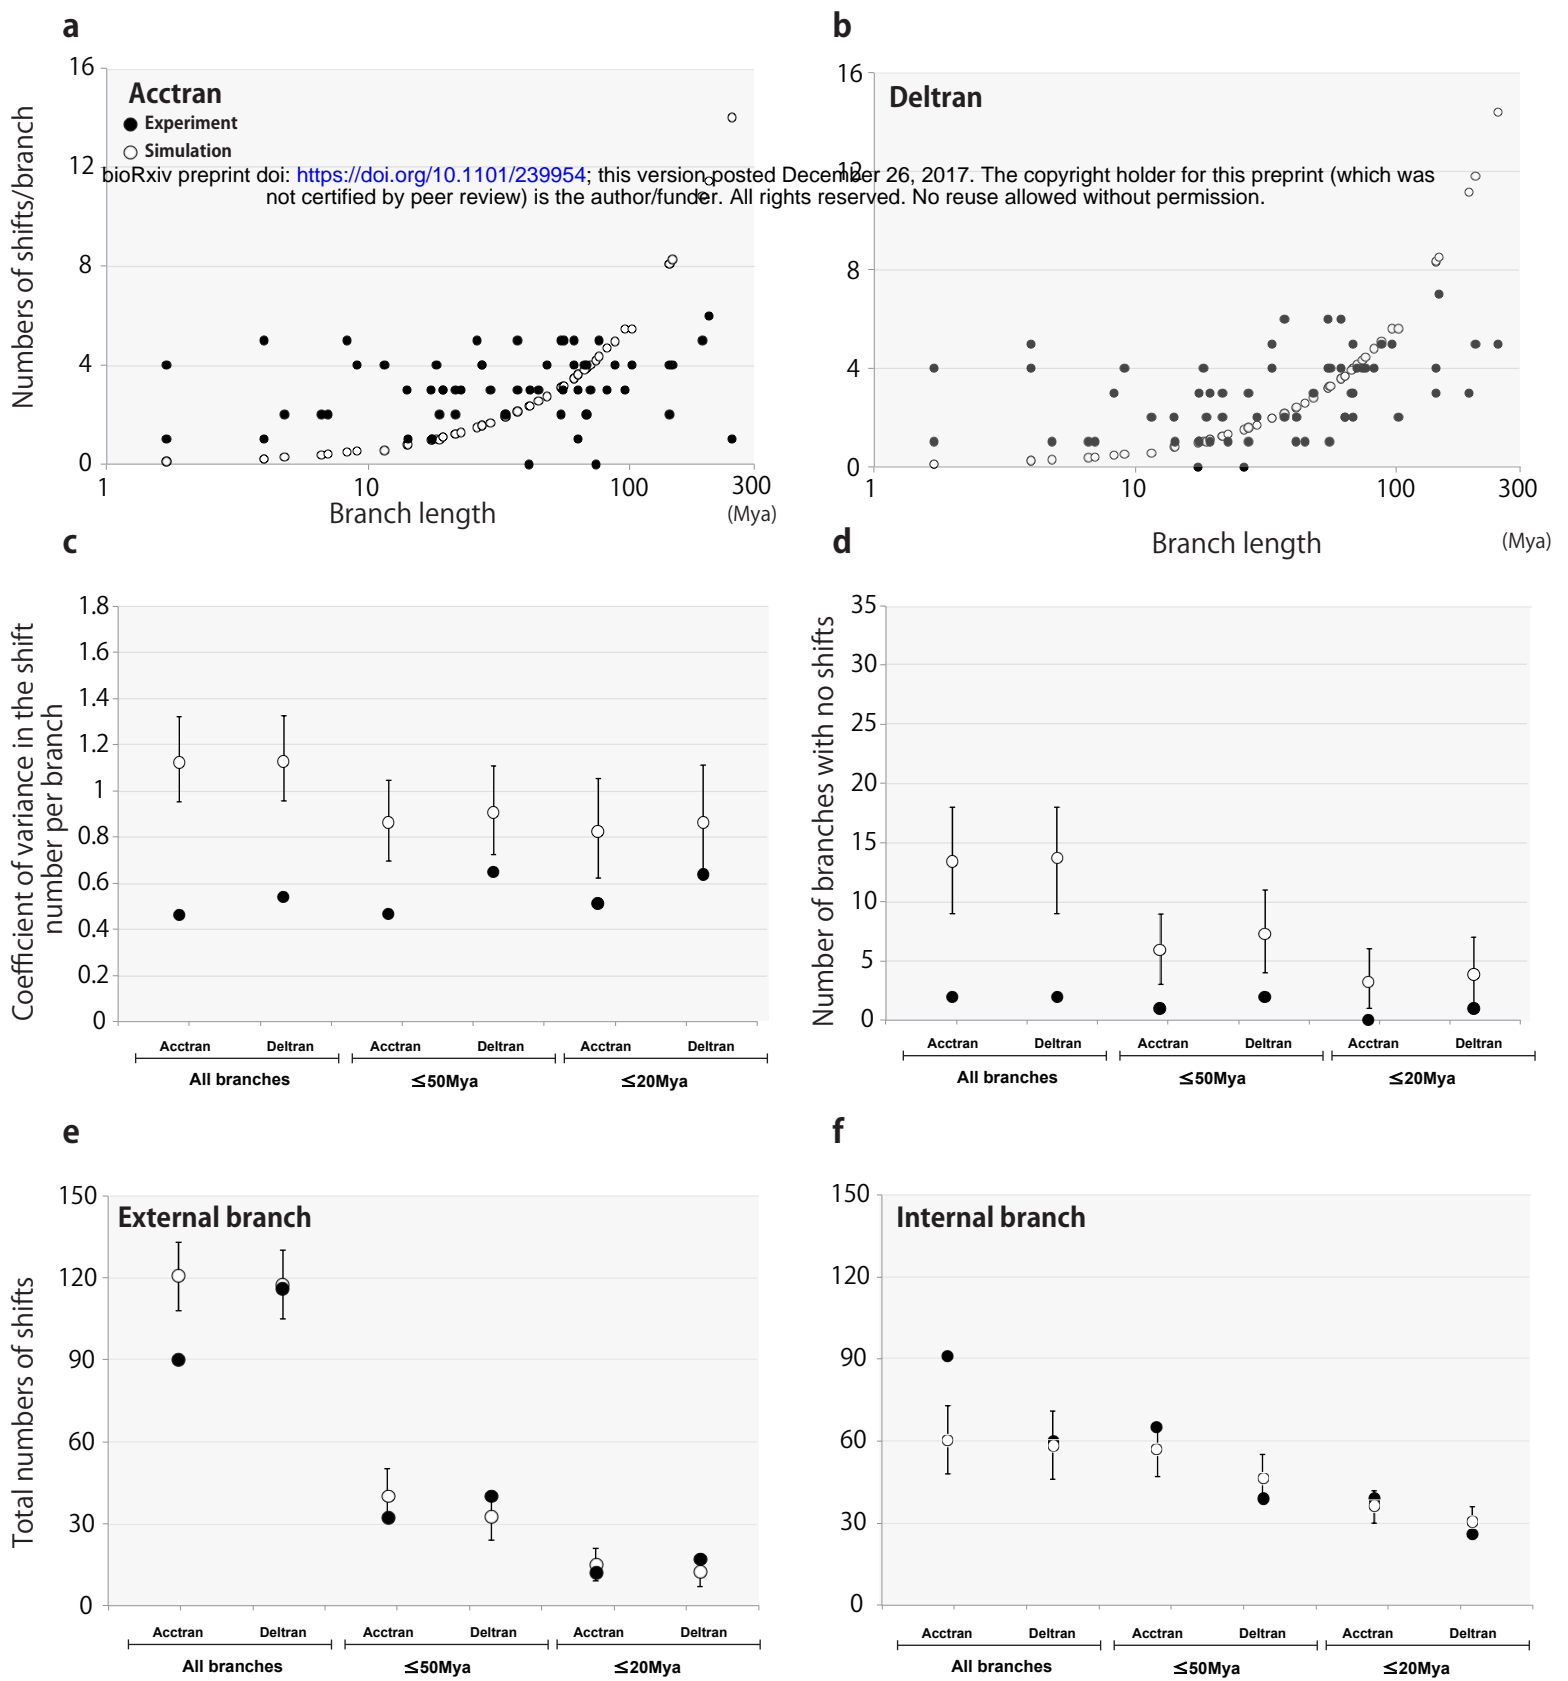

**Figure 6.**
