# **Title: Frequent Non-random Shifts in the Temporal Sequence of Developmental Landmark Events during Fish Evolutionary Diversification**

Running head: **Evolution of fish developmental sequence**

## **Authors**

Fumihiro Ito<sup>1,2\*</sup>, Tomotaka Matsumoto<sup>2,3</sup>, Tatsumi Hirata<sup>2,4</sup>

<sup>1</sup>Mammalian Genetics Laboratory, Genetic Strains Research Center, National Institute of Genetics, Mishima 411-8540, Shizuoka, Japan

<sup>2</sup>Department of Genetics, Graduate University for Advanced Studies (SOKENDAI), Mishima 411-8540, Shizuoka, Japan

<sup>3</sup>Division of Evolutionary Genetics, Department of Population Genetics, National Institute of Genetics, Yata 1111, Mishima, Shizuoka 411-8540, Japan.

<sup>4</sup>Division of Brain Function, National Institute of Genetics, Yata 1111, Mishima 411-8540, Shizuoka, Japan.

\*Correspondence author

Authors' current address:

Fumihiro Ito

Mammalian Genetics Laboratory, Genetic Strains Research Center, National Institute of Genetics, Mishima, Shizuoka 411-8540, Japan. Tel: +81-55-981-6816, FAX: +81-55-981-6817.

Email address: [fumihiro.0301@gmail.com](mailto:fumihiro.0301@gmail.com)

Word count: 7124

## **Abstract**

Morphology is a consequence of sequentially occurring developmental events, termed developmental sequence, and evolutionary changes in the sequence can generate morphological diversities. In this study, we examined evolutionary dynamics of the developmental sequence at a macro-evolutionary scale using the teleost fish. From the previous literature describing development of 31 fish species, we extracted the developmental sequences of 20 landmark events involving the whole body plan, and by using them, reconstructed ancestral developmental sequences. The phylogenetic comparisons of these sequences revealed event-dependent heterogeneity in the frequency of changing the sequences. We then determined potential event shifts that can parsimoniously explain the sequence changes on each node of the fish phylogenetic tree. These “heterochronic shifts” are widely distributed on almost of all the branches across the fish phylogeny. The simulation-based analysis indicated that this distribution of heterochronic shifts is not the result of random accumulation over phylogenetic time, but exhibits a curious constant trend so that individual phylogenetic branches harbor similar numbers of heterochronic shifts regardless of length. It is of great interest to know how these findings are related to morphological divergence in animals during evolution.

## **1. Introduction**

The morphology of each multicellular organism is constructed by a fixed temporal sequence of

developmental events, termed developmental sequence. Because development is an inherently step-by-step process, one might assume that the temporal sequence is not readily changeable and is phylogenetically conserved among closely related species that share morphological characteristics. Along these lines, if an evolutionary change occurs in the developmental sequence, it could bring about a significant impact on animal body plan and lead to morphological diversities. Indeed, previous comparisons of developmental sequences have detected rare epoch-making changes that can provide morphological uniqueness to one species that is different from the others (Strauss, 1990; Jeffery, Richardson, Coates & Bininda-Emonds, 2002; Maxwell, Harrison & Lasson, 2010) supporting the idea that the developmental sequence is basically a conserved trait in the phylogenetic history.

Regarding evolution of the developmental sequences, another influential factor would be the phylotypic period (Duboule, 1994). This is the developmental time frame during which evolutionally distant animal species resemble each other in appearance. The well-accepted hourglass-like model defines the phylotypic period as the middle phase of ontogenic development, typically known as the pharyngulal stage. Recent transcriptome analyses have indeed confirmed that inter-species diversities are kept to the minimum during this embryonic stage (Kalinka et al., 2010; Irie & Kurtani, 2011), suggesting some unknown biological reasons underlying this curious regularity. Although the phylotypic period was originally proposed by the morphological resemblance, very few morphological analyses have actually been conducted on species similarities during the period.

To explore the role for the developmental sequence in animal morphological evolution, the critically missing information is empirical evaluation of evolutionary changes that had

actually occurred in the developmental sequences. In particular, very few systematic comparisons have been made on the sequences of a wide range of developmental events that cover the whole body plan in any class of animals. Therefore, we have few clues about how commonly or rarely the developmental sequences of these animals had changed during their evolutionary history. In the last several decades, comparative methods for developmental sequences have been developed by several groups (Nunn & Smith, 1998; Jeffery, Bininda-Emonds, Coates & Richardson, 2002; Jeffery, Bininda-Emonds, Coates & Richardson, 2005; Harrison & Larsson, 2008; Germain & Laurin, 2009). These methods compare the relative order of developmental events among different species and successfully detected potential evolutionary shifts of the events in a parsimonious manner, namely “heterochronic shifts” in developmental sequences (Schoch, 2006; Smirnowaitet, Rundle, Bininda-Emonds & Spicer, 2007; Sanchez-Villagra, Goswami, Weisbecker, Mock & Kuratani, 2008; Laurin, 2014; Carril & Tambussi, 2017). Although most of these analyses have so far focused on the developmental sequences for a particular organ or limited body part, we considered that the methods themselves are similarly applicable to a global analysis of developmental sequences for the whole body plan.

In this study, we conducted a comprehensive survey of developmental sequences using teleost fish. The teleost fish is the largest group of vertebrates. Its abundant group members are characterized by great morphological diversities (Nelson, Grande & Wilson, 2016) and, at the same time, share the common characteristics of the fish body plan such as vertebrae, eyes, medial fins and swim bladders (Romer & Parsons, 1986). Owing to the popularity as developmental research materials, there are well-established staging tables for many fish species

that cover common clear-cut developmental landmarks. Hence, the teleost fish can provide an ideal dataset for systematic analyses of the early developmental sequences. Among the widely-used developmental landmarks, we chose 20 events that individually contribute to distinct body parts across the whole body plan. Using the dataset of 31 different fish species, we compared the developmental sequences and reconstructed their ancestral sequences over the phylogenetic tree. Our analysis indicated that the developmental sequences are in fact frequently changeable during the course of evolution, and that these changes are associated with the two following characteristics. (1) The frequency of sequence changes differs widely depending on the developmental event. (2) Heterochronic shifts are not simply accumulated along the phylogenetic time, but their number is kept more or less constant in individual phylogenetic branches regardless of length. We will discuss the potential implications of these findings.

## **2. Materials and Methods**

### **2.1 Construction of fish phylogenetic tree**

The overall topology of the phylogenetic tree followed the molecular phylogenetic relationship reported previously by Near et al. (2012, 2013). The minor branches missing in the tree were inserted based on the phylogenetic data obtained from Saitoh et al. (2011) and Yang et al. (2015) for Cypriniformes, Perez et al. (2007) and Friedman et al. (2013) for Cichliformes, and Pohl, Milvertz, Meyer & Vences. (2015) for Cyprinodontiformes. The divergent times were determined using the public database TIMETREE, *The Timescale of Life* (Hedges & Kumar, 2009) (Supplemental file.1).

## 2.2 Data sampling

Information about the temporal sequence of developmental events was extracted from 31 published research articles that describe normal fish development (Figure 1). The 20 developmental events used in this study were the first recognitions of blood circulation (bc), caudal fin ray (cfr), eye pigmentation (ep), embryonic shield (es), first somite (fs), hatch (h), heart beat/pulsing (hb), Kupffer's vesicle (kv), lens or lens placode/primodium (le), medial finfold (mff), mouth opening (mo), olfactory vesicle/pit/placode (olf), otolithes (oto), otic vesicle/placode/primodium (ot), optic vesicle/placode/primodium (op), pectoral fin bud (pfb), swim bladder (sw), tail bud (tb), three brain regionalization (tbr), and tail lift from yolk (tl). According to information in the articles, temporal orders of the developmental events were ranked (Figure 1). When the article did not describe a developmental event, the event was treated as a missing datum.

## 2.3 Rank analyses of developmental events

The raw ranks of individual developmental events were determined for the developmental sequences of extant fish (Figure 1) and the ancestral developmental sequences reconstructed as described below. The raw ranks were then normalized by the total number of the ranked events ( $r_{\max}$ ) in each species, resulting in the relative scaling of the ranks in the range between  $1/r_{\max}$  and 1 in all the species (Weisbecker, Goswami, Wroe & Sanchez-Villagra, 2008). To quantify variation of the ranks among the developmental sequences, pairwise distances in the ancestral ranks between all pairs of the sequences were summed and averaged for each pair of combinations.

134

## 135 **2.4 Reconstruction of ancestral developmental sequences**

136 We used the event-pairing method developed by Jeffery et al. (2002). In brief, all of the 190  
 137 pairs of developmental events in each species were scored based on the relative timing; when  
 138 one event occurs earlier, simultaneously or later compared with another event, the timing was  
 139 rated as 0, 1, or 2, respectively. By comparing the scored event-pairing matrices of different  
 140 species, the ancestral event-pairing matrix was reconstructed at each node of the fish  
 141 phylogenetic tree in a parsimonious manner under accelerated transformation (acctran) and  
 142 delayed transformation (deltran) optimizations using PAUP\* software (Swofford, 2002). The  
 143 ancestral event-pairing matrices were then re-converted to the ancestral developmental  
 144 sequences (Supplemental file.2).

145

## 146 **2.5 Detection of heterochronic shifts in fish phylogenetic tree**

147 The heterochronic shifts between two developmental sequences at each phylogenetic node were  
 148 detected using the Parsimov algorithm developed by Jeffery et al. (2005). This parsimony-based  
 149 algorithm determines the minimum number of event shifts that can explain the difference  
 150 between two developmental sequences. Following the instructions, we implemented a Perl  
 151 script, Parsimv7g.pl, with PAUP\* output log file in both acctran and deltran optimizations, and  
 152 mapped the detected heterochronic shifts onto the fish phylogeny (Supplemental files 3).

153

## 154 **2.6 Simulation-base analyses**

155 We examined whether the estimated number of heterochronic shifts in each branch can be

simply explained by random accumulation in the phylogenetic tree. The simulation was based on a simple assumption that a heterochronic shift occurs at a constant rate per unit time and therefore, accumulates in proportion to branch length in the phylogenetic tree. In this simulation, we did not consider the event-dependent differences in the shift frequencies. The simulation randomly distributed the estimated heterochronic shifts over the fish phylogenetic branches solely depending on their branch lengths. The simulation was replicated 100,000 times to obtain the expected distribution of heterochronic shifts in each branch under the assumption of random accumulation. The distribution of heterochronic shifts was then compared with the actual distribution of the heterochronic shifts in the fish phylogenetic branches. In this study, we used year as the time scale of the branch length. However, in some analyses, we converted the time scale to generation by considering the average generation times of individual fish species (Supplemental file 4) and confirmed the consistency of the results.

### **3. Results**

#### **3.1 Phylogenetic relationship of 31 fish**

For the present analyses, we used 30 teleost fish belonging to 13 distinct orders as the in-group, because the developmental sequences of these fish have been well-documented in previous articles (Figure 1). As an out-group, the amiadae fish, *Amia calva*, was used because it retains ancestral morphological characteristics and because a recent molecular analysis confirmed its location as the out-group of teleost fish (Near et al., 2012). In the constructed teleost phylogenetic tree, the examined fish species were widely distributed and represented distinct branches of teleost clade in a fairly unbiased manner (Figure 2). Because fish development in



the marine environment has rarely been documented, the fish species covered in this study were basically freshwater fish, but also included several anadromous fish, such as *Gasterosteus aculeatus*, which develop in freshwater but migrate between the sea and freshwater in their adult life cycles.

### 3.2 Comparison of temporal orders of developmental events among fish

We selected 20 developmental events that consistently appeared as landmarks in the developmental staging of many fish species (Figure 1). For this selection, in the hope to gain a global picture of developmental sequences for the whole body plan, we intentionally included events that belong to substantially different biological systems and contexts; e.g., the ones that originate from different germ layers or that give rise to different cell types or separate body parts. Additionally, the list also included a small number of seemingly interrelated events such as formations of optic vesicle/placode/primodium (op), lens/lens placode (le) and eye pigmentation (ep). We gathered information about these 20 events from the articles reporting the development of 31 fish, and ranked the orders of individual events in the temporal sequence for each species (Figure 1).

We first compared rank orders of each event among 30 in-group fish species. To minimize effects of simultaneous occurrence of events and missing data on the comparison, the raw ranks (Figure 1) were rescaled to normalized ranks that fit within the same range in all the fish species (see Methods). Figure 3a shows distribution of the normalized ranks for individual developmental events, which were horizontally arranged according to the average values. Interestingly, the ranges of variations in the rank widely differed depending on the event. One

extreme case was embryonic shield (es), which always appeared first in the developmental sequences obtained from the 29 fish species with no variation, excluding one missing description in *Galaxias maculatus* (Figure 1). In contrast, relatively large variations in the rank were observed for the appearance of Kupffer's vesicle (kv), hatch (h), medial finfold (mff) and swim bladder (sb), suggesting that these events can more easily change their temporal orders in the developmental sequence (Figure 3a).

To explore the evolutionary history of developmental sequences, we next reconstructed ancestral developmental sequences at each node of the phylogenetic branches by using the event-pairing method (Jeffery et al., 2002). This algorithm compares the relative orders of all the event pairs between two different developmental sequences and generates the ancestral sequences determined as a parsimonious solution under acctran and deltran optimizations (Supplemental file 2). Using the obtained ancestral developmental sequences, we compared the normalized ranks of individual events as we did in Figure 3a. Overall, the rank orders of individual events in the ancestral developmental sequences (Figure 3b and 3c) were quite similar to those in the extant fish sequences (Figure 3a); when the developmental events were horizontally aligned in the same order of the extant average ranks, there were only a few inversions in the order of two successive events at the average level (e.g., the order between first somite (fs) and tail bud (tb)). Because this sequence reconstitution was based on parsimony, the variations of estimated ranks were kept to nearly minimum. Still, individual events exhibited a similar trend of rank variations to that observed in the extant fish sequences, further confirming the idea that some developmental events change their orders more frequently than the others during evolution.

Because the rank seemed to fluctuate depending on the event, we more systematically analyzed the size of variations of the ranks. As an index of rank changeability, the pairwise rank distances between all pairs of the ancestral developmental sequences were measured and represented as the average value for each pair (Figure 4). Comparable values were obtained by acctran and deltran optimizations (Spearman's rank correlation for the two optimizations;  $r = 0.839$ ). When the events were temporally arranged along the standard ontogenic time frame defined as the average rank orders in the extant fish, the rank changeability was found to be squeezed in the middle phase of the developmental sequence, involving three brain regionalizations (tbr), otic vesicle/placode/primodium (ot) and lens or lens placode/primodium (le) (Figure 4). The medial finfold (mff) around late-tail bud stage, in contrast, recorded the largest rank changeability.

We then focused on the actual sequence of developmental events. Figure 5 shows the percentage of the sequences in which one event (shown in row) occurs later than another (shown in column) among the 30 extant in-group fish. In general, the sequence of two temporally distant events was quite conservative, with no reversal in the order in many combinations, whereas the neighboring events more frequently change their orders. If a closer look was given to the sequence of anatomically interrelated events, the temporal order of the optic vesicle/placode/primodium (op) and the lens/lens placode (le) was fixed in all the fish species, and that of the lens/lens placode (le) and the eye pigmentation (ep) was almost fixed except for one sequence reversal in *Heterobranchus bidorsalis*. Another interesting trend was about the timing of hatch (h), which often changed the orders with the three late events, mouth opening (mo), swim bladder (sb) and caudal fin ray (cfr). Similar results were obtained from the

comparison of event orders in ancestral developmental sequences (Figure S1).

### 3.3 Distribution of heterochronic shifts across the fish phylogenetic tree

Using the widely-used Parsimov algorithm (Jeffery et al., 2005), we next searched for heterochronic shifts of the events that can explain the changes from one sequence to another at every node of the fish phylogenetic tree. Although this is a parsimony-based algorithm and therefore estimates the minimum number of event shifts, we detected 184 (acctrans), 179 (deltrans) and 94 (conserved between acctrans and deltrans) heterochronic shifts in total (Supplemental file 3). The fish phylogenetic tree has 60 branches in total. When the detected shifts were mapped over the phylogenetic tree, multiple heterochronic shifts were observed on almost all the branches (Figure 2, Supplemental file 3). For example, in the relatively long branch of order Salmoniformes, five and three heterochronic shifts were detected by acctrans and deltrans optimizations, respectively.

Because a substantial number of heterochronic shifts were detected widely across the fish phylogeny, we wondered whether these shifts might happen rather frequently and be randomly accumulated over the evolutionary history. To address this question, we took a simulation-based approach. Given that a heterochronic shift occurs at a random stochastic manner and is neutrally accumulated, we simulated the expected distribution of the number of heterochronic shifts, of which the number was nearly proportional to the phylogenetic branch length (white circles in Figure 6a and 6b). By contrast, the actual distribution of heterochronic shifts detected by the Parsimov analysis was much more constant, regardless of the branch length in both acctrans and deltrans optimizations (black circles in Figure 6a and 6b). Coefficient

of variation of the number of heterochronic shifts across the branches also showed smaller values for the experimental dataset than for the simulation data (Figure 6c), indicating that branch-by-branch fluctuations of the number of heterochronic shifts are actually more limited compared with the values expected under simulation. In addition, the number of the phylogenetic branches that harbored no heterochronic shifts was significantly smaller for the experimental dataset than that for the simulation data (Figure 6d). Because inclusion of an extremely long branch could skew the statistical results, we performed the same statistical comparison using only relatively short branches ( $\leq 50\text{Mya}$  and  $\leq 20\text{Mya}$ ). These analyses again showed similar results, indicating that the number of heterochronic shifts per branch is more constant than the expectation under the assumption of random accumulation (Figure 6c, 6d, and Figure S2). Replacing the phylogenetic time scale with the generation number basically did not qualitatively affect the results of the analyses (Figures S3 and S4).

The heterochronic shifts of developmental events are sometimes associated to differentiation of terminal phenotypes (Gunter, Koppermann & Meyer, 2014). Thus, we examined the topological distribution of the heterochronic shifts by separately examining internal and terminal branches. In both of the branch types, the numbers of actual heterochronic shifts were basically in the range of the expected numbers in the simulation (Figure 6e and 6f). Significant differences were only exceptionally observed in the all branch category under the acctran optimization; however, we cannot rule out the possibility that the inclusion of extremely long branches in this category affected the results. In conclusion, this analysis did not positively support a preferential occurrence of heretochronic shifts in either the external or internal branches.

288

#### 289 **4. Discussion**

290 The present study provides empirical evidence that developmental sequences are in fact  
 291 changeable during evolution; the extant fish species clearly involve historic signs showing that  
 292 their ancestors had experienced dynamic and frequent rearrangement of the developmental  
 293 sequences. This finding may not be exactly concordant with the traditional view that the  
 294 developmental sequence is a phylogenetically conserved trait, which provides the blueprint for  
 295 the common body plan among related species. One reason is probably our wide selection of  
 296 developmental events; we intentionally took up the events that cover a whole variety of  
 297 embryonic origins, cell types, body parts and biological systems, aiming for understanding the  
 298 global body plan. In contrast, the major focus of previous studies was in-depth understanding of  
 299 developmental sequences for a restricted body part or organ (Schlosser, 2008; Hautier et al.,  
 300 2011; Workman, Charvet, Clancy, Darlington & Finlay, 2013). Therefore, even though we only  
 301 analyzed one group of species that share the highly conserved body plan, rather frequent shifts  
 302 of the events could be observed. There is increasing evidence for modular control of formation  
 303 of different body parts (Klingenberg, Badyaev, Sowry & Beckwith 2001; Kawanishi et al.,  
 304 2013; Schmidt & Starck, 2010). This modular nature of individual body parts can underlie the  
 305 large fluctuations of developmental sequences observed in this study, and possibly contribute to  
 306 individual evolution of different body parts toward morphological diversification.

307 Although the heterochronic shifts detected in this study are widespread across fish  
 308 phylogeny, our simulation-based analyses uncovered certain regularity in the distribution.  
 309 Namely, the shifts are not randomly accumulated over the evolutionary time, but there appears

to be some force making the number of shifts constant in individual phylogenetic branches. Currently, we cannot effectively interpret this perplexing result, and only note two potential scenarios from different angles, which are not necessarily mutually exclusive. First, it may be possible that the heterochronic shift is a branching-related process. If a new branch often comes with new shifts, then the shift number should be more correlated with the branch number rather than its length. If speciation processes are concerned, this is actually a very attractive scenario, because the heterochronic shift can support differentiation of branch-specific phenotypes in each species. Second, the seeming constancy of the shift number might be related to the limited configuration of acceptable developmental sequences. Our event sequence analyses indeed showed that only certain types of changes are acceptable in the developmental sequences (Figure 5). This limitation probably stems from both developmental and evolutionary constraints in order to construct a fit functional body plan. Yet, for the moment, we cannot determine how the limitation of sequence configurations can shape the distribution of potential heterochronic shifts, because they are limited, but still a great many acceptable sequences exist.

One interesting finding of this study is that some developmental events change their temporal orders more drastically than others during evolution. Of particular note is the emergence of medial finfold (mff), of which rank changeability was the highest among all the events (Figure 4). The medial finfold is a morphogenetic field for fins. A recent study reports that this single morphogenetic field actually is a mosaic composed of three distinct fin primordia (Larouch, Zelditch & Cloutier, 2017). Thus, it is possible that the three primordia behaved as independent modules during evolution, thereby expanding the temporal range of this event. Another interesting example is the timing of hatch (h), which is relatively easily changeable

with the three following developmental events, mouth opening (mo), swim bladder (sb) and caudal fin ray (cfr). All these events are directly related to the life strategy of how a fish survives during the larval stage, and therefore changing the orders may be advantageous under some circumstances, particularly when fish have to adapt to a new environment (Miller & Kendall, 2009). Indeed, the temporal shift of birth timing has been regarded as a symbolic example of “heterochrony”, an evolutionary force based on maneuvering developmental machinery (Keyte & Smith, 2012; Dail, Reznick & Brainerd, 2017; Botelho, Smith-Paredes & Vargas, 2015; Werneburg, Laurin, Koyabu & Sanchez-Villagra, 2016).

When the developmental events were aligned along the ontogenetic sequence, the rank changeability was squeezed in the middle phase of the early development involving three brain regionalization (tbr), otic placode/primodium (ot), and lens formation (le) (Figure 4). These events are typical characteristics of the conserved phylotypic stage defined by the hourglass model (Richardson, 1995; Irie, 2017). The hourglass model has been gaining increasing support from the recent transcriptome analyses but still lacks sufficient evidence from objective morphological analyses. Although the relationship between the developmental sequences and morphological similarity is not very straightforward, our results seem to provide another support for the hourglass model from the morphological point of view.

There is a common observation that the external temperature affects developmental time frames (Schmidt & Starck, 2010; Mabee, Olmstead & Cubbage, 2000). Because most fish reproduce by external fertilization and the embryos develop under fluctuating temperatures, temporal shifts of individual developmental events might sometimes occur in fish under the natural environment. Indeed, a study reports that the developmental sequence is polymorphic



even in one fish species (de Jong, Colbert, Witte & Richardson, 2009). Thus, fish may be relatively tolerant to sporadic shifts of developmental events in the natural ontogeny, and frequent encounters with such situations somehow increase the chances that some fish adopt a shift in a persistent manner. Currently, it is not clear whether such fish-specific circumstances are reflected in the present results. Future systematic analyses using other groups of animals will address this issue.

### Acknowledgements

We thank Dr. Toshihiko Shiroishi, Dr. Yasushi Hiromi, Dr. Naoki Irie, Dr. Takanori Amano, Dr. Yuuta Moriyama and Dr. Kousuke Mouri for comments that helped greatly improve the manuscript. We also thank Dr. Erin E. Maxwell and Dr. Luke B. Harrison for their advice on parsimony analyses.

### Reference

- Arakawa, T., Kanno, Y., Akiyama, N., Kitano, T., Nakatsuji, N., & Nakatsuji, T. (1999). Stages of embryonic development of the ice goby (shiro-uo), *Leucopsarion petersii*. *Zoological Science*, 16, 761-773. doi.org/10.2108/zsj.16.761
- Armstrong, P. B., & Child J. S., (1965). Stages in normal development of *Fundulus heteroclitus*. *The Biological Bulletin*, 128, 143-168. doi:10.2307/1539545

375 Ballard, W. W. (1969). Normal embryonic stages of *Gobius niger* jozo. *Pubbl Staz Zool Napoli*,  
376 37, 1-17.

377 Ballard, W. W. (1973). Normal embryonic stages for salmonid fishes, based on *Salmo gairdneri*  
378 Richardson and *Salvelinus fontinalis* (Mitchill). *Journal of Experimental Zoology Part A:*  
379 *Ecological and Integrative Physiology*, 184, 7-26. doi: 10.1002/jez.1401840103  
380

381 Ballard, W. W., (1986). Morphogenetic movements and a provisional fate map of development  
382 in the holostean fish, *Amia calva*. *Journal of Experimental Zoology Part A: Ecological and*  
383 *Integrative Physiology*, 238, 355-372. doi:10.1002/jez.1402380308  
384

385 Balon,, E. K. (1977). Early ontogeny of *Labeotropheus Ahl*, 1927 (Mbuna, Cichlidae, Lake  
386 Malawi), with a discussion on advanced protective styles in fish reproduction and development.  
387 *Environmental Biology of Fishes*, 2, 147-176.

388 Basak, S. K., Basak, B., Gupta, N., Haque, M. M., & Amin, R. (2014). Embryonic and larval  
389 development of silver barb (*Barodes gonionotus*) in a mobile hatchery under laboratory  
390 Condition. *European Scientific Journal, Special ed*, 3, 258-270.  
391

392 Benzie, V. (1968). Stages in the normal development of *Galaxias maculatus attenuatus*  
393 (Jenyns). *New Zealand Journal of Marine and Freshwater Research*, 2, 606-627.  
394

395 Botelho, J. F., Smith-Paredes, D., & Vargas A. O. (2015). Altriciality and the Evolution of Toe  
396 Orientation in Birds. *Journal of Evolutionary Biology*, 42,  
397 502-510. doi: .org/10.1007/s11692-015-9334-7  
398  
399 Carril, J., & Tambussi, C. P. (2017). Skeletogenesis of *Myiopsitta monachus* (Psittaciformes)  
400 and sequence heterochronies in Aves. *Evolution & Development*, 19, 17-28.  
401 doi:10.1111/ede.12211  
402  
403 Cunningham, J. E. R., & Balon, E. K. (1985). Early ontogeny of *Adinia xenica* (Pisces,  
404 Cyprinodontiformes): 1. The development of embryos in hiding. *Environmental Biology of*  
405 *Fishes*, 14, 115-166.  
406  
407 de Jong, I. M., Colbert, M. W., Witte, F., & Richardson, M. K. (2009). Polymorphism in  
408 developmental timing: intraspecific heterochrony in a Lake Victoria cichlid. *Evolution &*  
409 *Development*, 11, 625-635. doi:10.1111/j.1525-142X.2009.00370.x  
410 de Jong, I. M., Witte, F., & Richardson, M. K. (2009). Developmental stages until hatching of  
411 the Lake Victoria cichlid *Haplochromis piceatus* (Teleostei: Cichlidae). *Journal of Morphology*,  
412 270, 519-535. doi:10.1002/jmor.10716  
413  
414 Dial, T. R., Reznick, D. N., & Brainerd, E. L. (2017). Heterochrony in the evolution of  
415 Trinidadian guppy offspring size: maturation along a uniform ontogenetic trajectory.  
416 *Proceedings of the Royal Society B: Biological Sciences*, 284, doi:10.1098/rspb.2017.1319

417

418 Duboule, D. (1994). Temporal colinearity and the phylotypic progression: a basis for the  
419 stability of a vertebrate Bauplan and the evolution of morphologies through heterochrony.  
420 *Development (suppl.)*, 135-142.

421

422 Friedman, M., Keck, B. P., Dornburg, A., Eytan, R. I., Martin, C. H., Hulsey, C. D., . . . Near, T.  
423 J. (2013). Molecular and fossil evidence place the origin of cichlid fishes long after Gondwanan  
424 rifting. *Proceedings of the Royal Society B: Biological Sciences*, 280, 20131733.  
425 doi:10.1098/rspb.2013.1733

426

427 Fujimura, K., & Okada, N. (2007). Development of the embryo, larva and early juvenile of Nile  
428 tilapia *Oreochromis niloticus* (Pisces: Cichlidae). Developmental staging system. *Development*  
429 *Growth & Differentiation*, 49, 301-324. doi:10.1111/j.1440-169X.2007.00926.x

430 Germain, D., & Laurin, M. (2009). Evolution of ossification sequences in salamanders and  
431 urodele origins assessed through event-pairing and new methods. *Evolution & Development*, 11,  
432 170-190. doi:10.1111/j.1525-142X.2009.00318.x

433

434 Gunter, H. M., Koppermann, C., & Meyer A. (2014). Revisiting de Beer's textbook example of  
435 heterochrony and jaw elongation in fish: calmodulin expression reflects heterochronic growth,  
436 and underlies morphological innovation in the jaws of belonoid fishes. *Evodevo*, 5, 8.  
437 doi:10.1186/2041-9139-5-8

438

439 Hall, T. E., Smith, P., & Johnston, I. A. (2004). Stages of Embryonic Developmsnt in the  
 440 Atlantic Cod *Gadus morhua*. *Journal of Morphology*, 259, 255-270. doi: 10.1002/jmor.10222  
 441  
 442 Harrison, L. B., & Larsson, H. C. (2008). Estimating evolution of temporal sequence changes: a  
 443 practical approach to inferring ancestral developmental sequences and sequence heterochrony.  
 444 *Systematic Biology*, 57, 378-387. doi:10.1080/10635150802164421  
 445  
 446 Hautier, L., Weisbecker, V., Goswami, A., Knight, F., Kardjilov, N., & Asher, R. J. (2011).  
 447 Skeletal ossification and sequence heterochrony in xenarthran evolution. *Evolution &*  
 448 *Development*, 13, 460-476. doi:10.1111/j.1525-142X.2011.00503.x  
 449  
 450 Hedges, S. B. & Kumar, S. (2009). The timetree of life. New York, NY: Oxford University  
 451 Press.  
 452 Humphrey, C., Klumpp, D. W., & Pearson, R. (2003). Early development and growth of the  
 453 east rainbowfish, *Melanotaenia splendida splendida*. *Marine and Freshwater Research*, 54,  
 454 17-25. doi: org/10.1071/MF02037  
 455  
 456 Irie, N. (2017). Remaining questions related to the hourglass model in vertebrate evolution.  
 457 *Current Opinion in Genetics & Development*, 45, 103-107. doi:10.1016/j.gde.2017.04.004  
 458

- Irie, N., & Kuratani, S. (2011). Comparative transcriptome analysis reveals vertebrate phylotypic period during organogenesis. *Nature Communications*, 2, 248. doi:10.1038/ncomms1248
- Iwamatsu, T. (2004). Stages of normal development in the medaka *Oryzias latipes*. *Mechanisms of Development*, 121, 605-618. doi:10.1016/j.mod.2004.03.012
- Iwamatsu, T., & Hirata, K. (1984). Normal course of development of the Java medaka, *Oryzias javanicus*. *Bull Aichi Univ Edu (Nat Sci)*, 33, 87-109.
- Jeffery, J. E., Bininda-Emonds, O. R., Coates, M. I., & Richardson, M. K. (2002). Analyzing evolutionary patterns in amniote embryonic development. *Evolution & Development*, 4, 292-302. doi: 10.1046/j.1525-142X.2002.02018.x
- Jeffery, J. E., Bininda-Emonds, O. R., Coates, M. I., & Richardson, M. K. (2005). A new technique for identifying sequence heterochrony. *Systematic Biology*, 54, 230-240. doi:10.1080/10635150590923227
- Jeffery, J. E., Richardson, M. K., Coates, M. I., & Bininda-Emonds, O. R. (2002). Analyzing developmental sequences within a phylogenetic framework. *Systematic Biology*, 51, 478-491. doi:10.1080/10635150290069904

480 Kalinka, A. T., Varga, K. M., Gerrard, D. T., Preibisch, S., Corcoran, D. L., Jarrells, J., . . .  
481 Tomancak, P. (2010). Gene expression divergence recapitulates the developmental hourglass  
482 model. *Nature*, 468, 811-814. doi:10.1038/nature09634  
483  
484 Kawanishi, T., Kaneko, T., Moriyama, Y., Kinoshita, M., Yokoi, H., Suzuki, T., . . . Takeda, H.  
485 (2013). Modular development of the teleost trunk along the dorsoventral axis and *zic1/zic4* as  
486 selector genes in the dorsal module. *Development*, 140, 1486-1496. doi:10.1242/dev.088567  
487  
488 Keyte, A., & Smith, K. K. (2012). Heterochrony in somitogenesis rate in a model marsupial,  
489 *Monodelphis domestica*. *Evolution & Development*, 14, 93-103.  
490 doi:10.1111/j.1525-142X.2011.00524.x  
491  
492 Kimmel, C. B., Ballard, W. W., Kimmel, S. R., Ullmann, B., & Schilling, T.F. (1995). Stages of  
493 embryonic development of the zebrafish. *Developmental Dynamics*, 203, 253-310.  
494 doi:10.1002/aja.1002030302  
495  
496 Klingenberg, C. P., Badyaev, A. V., Sowry, S. M., & Beckwith, N. J. (2001). Inferring  
497 developmental modularity from morphological integration: analysis of individual variation and  
498 asymmetry in bumblebee wings. *American Naturalist*, 157, 11-23. doi:10.1086/317002  
499  
500 Kratochwil, C. F., Sefton, M. M., & Meyer, A. (2015). Embryonic and larval development in  
501 the Midas cichlid fish species flock (*Amphilophus spp.*): a new evo-devo model for the

investigation of adaptive novelties and species differences. *BMC Developmental Biology*, 15, 12.

doi:10.1186/s12861-015-0061-1

Larouche, O., Zelditch, M. L., & Cloutier, R. (2017). Fin modules: an evolutionary perspective on appendage disparity in basal vertebrates. *BMC Biology*, 15, 32.

doi:10.1186/s12915-017-0370-x

Laurin, M. (2014). Assessment of modularity in the urodele skull: an exploratory analysis using ossification sequence data. *Journal of Experimental Zoology Part B: Molecular and Developmental Evolution*, 322, 567-585. doi:10.1002/jez.b.22575

Long, W. L., & Ballard, W. W., (1976). Normal Embryonic Stages of the White Sucker, *Catostomus commersoni*. *Copeia*, 1976, 342-351. doi. 10.2307/1443957

Mabee, P. M., Olmstead, K. L., & Cabbage, C.C. (2000). An experimental study of intraspecific variation, developmental timing, and heterochrony in fishes. *Evolution*, 54, 2091-2106

Marimuthu, K., & Haniffa, M. A. (2007). Embryonic and Larval Development of the Striped Snakehead *Channa striatus*. *Taiwania*, 52, 84-92. doi:10.6165/tai



522 Maxwell, E. E., Harrison, L. B., & Larsson, H. C. (2010). Assessing the phylogenetic utility of  
523 sequence heterochrony: evolution of avian ossification sequences as a case study. *Zoology*  
524 (*Jena*), 113, 57-66. doi:10.1016/j.zool.2009.06.002  
525  
526 McElman, J. F., & Balon, E. K. (1979). Early ontogeny of walleye, *Stizostedion vitreum*, with  
527 steps of saltatory development. *Environmental Biology of Fishes*, 4, 309-348.  
528  
529 Meijide, F. J., & Guerrero, G. A., (2000). Embryonic and larval development of a  
530 substrate-brooding cichlid *Cichlasoma dimerus* (Heckel, 1840) under laboratory conditions.  
531 *Journal of Zoology*, 252, 481-493. doi: 10.1111/j.1469-7998.2000.tb01231.x  
532  
533 Miller, B. S., & Kendall A. W. (2009). Early life history of marine fishes. Berkeley, Calif.,  
534 University of California Press; xii, 364 p. p.  
535 Near, T. J., Dornburg, A., Eytan, R. I., Keck, B. P., Smith, W. L., Kuhn, K. L., . . . Wainwright,  
536 P. C. (2013). Phylogeny and tempo of diversification in the superradiation of spiny-rayed fishes.  
537 *Proceedings of the National Academy of Sciences of the United States of America*, 110,  
538 12738-12743. doi:10.1073/pnas.1304661110  
539  
540 Near, T. J., Eytan, R. I., Dornburg, A., Kuhn, K. L., Moore, J. A., Davis, M. P., . . . Smith, W. L.  
541 (2012). Resolution of ray-finned fish phylogeny and timing of diversification. *Proceedings of*  
542 *the National Academy of Sciences of the United States of America*, 109, 13698-13703.  
543 doi:10.1073/pnas.1206625109

544

545 Nelson, J. S, Grande, T. C, & Wilson, M. V. H. (2016). Fishes of the world (5th ed). New York:  
546 Wiley.

547

548 Nunn, C. L., & Smith, K. K. (1998). Statistical analyses of developmental sequences: the  
549 craniofacial region in marsupial and placental mammals. *American Naturalist*, 152, 82-101.  
550 doi:10.1086/286151

551

552 Olaniyi, W. A., & Omitogun, O. G. (2014). Embryonic and larval developmental stages of  
553 African giant catfish *Heterobranchus bidorsalis* (Geoffroy Saint Hilaire, 1809) (Teleostei,  
554 Clariidae). *Springerplus*, 3, 677. doi:10.1186/2193-1801-3-677

555

556 Pelluet, D. (1944) Criteria for the recognition of development stages in the salmon ( *Salmo*  
557 *salar* ). *Journal of Morphology*, 74, 395-407. doi: 10.1002/jmor.1050740305

558

559 Perez, G. A., Rican, O., Orti, G., Bermingham, E., Doadrio, I., & Zardoya, R. (2007).  
560 Phylogeny and biogeography of 91 species of heroine cichlids (Teleostei: Cichlidae) based on  
561 sequences of the cytochrome b gene. *Molecular Phylogenetics and Evolution*, 43, 91-110.  
562 doi:10.1016/j.ympev.2006.08.012

563

564 Pohl, M., Milvertz, F. C., Meyer, A., & Vences, M. (2015). Multigene phylogeny of  
565 cyprinodontiform fishes suggests continental radiations and a rogue taxon position of  
566 Pantanodon. *Vertebrate Zoology*, 65, 37-44.  
567  
568 Puvaneswari, S., Marimuthu, K., Karuppasamy, R., & Haniffa, M. A. (2009). Early embryonic  
569 and larval development of Indian catfish, *Heteropneustes fossilis*. *EurAsian Journal of*  
570 *BioSciences* 3, 84-96. doi: 10.5053/ejobios.2009.3.0.12  
571  
572 Richardson, M. K. (1995). Heterochrony and the phylotypic period. *Developmental Biology*,  
573 172, 412-421. doi:10.1006/dbio.1995.8041  
574  
575 Romer, A. S. & Parsons, T. S. (1986). The vertebrate body (6th ed). Philadelphia, PA: Saunders  
576 College Publications.  
577 Saitoh K, Sado T, Doosey MH, Bart Jr HL, Inoue JG, Nishida M., . . . Miya M. (2011).  
578 Evidence from mitochondrial genomics supports the lower Mesozoic of South Asia as the time  
579 and place of basal divergence of cypriniform fishes (Actinopterygii: Ostariophysi). *Zoological*  
580 *Journal of the Linnean Society*, 161, 633 – 662. doi:10.1111/j.1096-3642.2010. 00651.x  
581  
582 Sanchez-Villagra, M. R., Goswami, A., Weisbecker, V., Mock, O., & Kuratani, S. (2008).  
583 Conserved relative timing of cranial ossification patterns in early mammalian evolution.  
584 *Evolution & Development*, 10, 519-530. doi:10.1111/j.1525-142X.2008.00267.x  
585

Schlosser, G. (2008). Development of the retinotectal system in the direct-developing frog *Eleutherodactylus coqui* in comparison with other anurans. *Frontiers in Zoology*, 5, 9. doi:10.1186/1742-9994-5-9

Schmidt, K., & Starck, J. M. (2010). Developmental plasticity, modularity, and heterochrony during the phylotypic stage of the zebra fish, *Danio rerio*. *Journal of Experimental Zoology Part B: Molecular and Developmental Evolution*, 314, 166-178. doi:10.1002/jez.b.21320

Schoch, R. R. (2006). Skull ontogeny: developmental patterns of fishes conserved across major tetrapod clades. *Evolution & Development*, 8, 524-536. doi:10.1111/j.1525-142X.2006.00125.x

Shardo, J. D. (1995). Comparative embryology of teleostean fishes. I. Development and staging of the American shad, *Alosa sapidissima* (Wilson, 1811). *Journal of Morphology*, 225, 125-167. doi:10.1002/jmor.1052250202

Smirthwaite, J. J., Rundle, S. D., Bininda-Emonds, O. R., & Spicer J. I. (2007). An integrative approach identifies developmental sequence heterochronies in freshwater basommatophoran snails. *Evolution & Development*, 9, 122-130. doi:10.1111/j.1525-142X.2007.00143.x

Strauss, R. E. (1990). Heterochronic Variation in the Developmental Timing of Cranial Ossifications in Poeciliid Fishes (Cyprinodontiformes). *Evolution*, 44, 1558-1567. doi:10.1111/j.1558-5646.1990.tb03846.x

608

609 Swarup, H. (1958). Stages of development of the stickleback *Gasterosteus aculeatus*. *Journal of*  
610 *Embryology and Experimental Morphology*, 6, 373-383.

611

612 Swofford, D. L. (2002). PAUP\*. Phylogenetic Analysis Using Parsimony ( \*and other methods),  
613 v. 4beta10. Sunderland, MA: Sinauer.

614

615 Tavalga, W. N., & Rugh, R. (1947). Development of the platyfish, *Platypoecilus maculatus*.  
616 *Zoologica; Scientific Contributions of the New York Zoological Society*, 32, 1-15.

617

618 Tsai, H. Y., Chang, M., Liu, S. C., Abe, G., & Ota, K. G. (2013). Embryonic development of  
619 goldfish (*Carassius auratus*): a model for the study of evolutionary change in developmental  
620 mechanisms by artificial selection. *Developmental Dynamics*, 242, 1262-1283.

621 doi:10.1002/dvdy.24022

622

623 Verma, P., (1970). Normal stages in the development of *Cyprinus carpio* var. communis L. *Acta*  
624 *Biologica Academiae Scientiarum Hungaricae*, 21, 207-218.

625

626 Weisbecker, V., Goswami, A., Wroe, S., & Sanchez-Villagra, M. R. (2008). Ossification  
627 heterochrony in the therian postcranial skeleton and the marsupial-placental dichotomy.  
628 *Evolution*, 62, 2027-2041. doi:10.1111/j.1558-5646.2008.00424.x

629

- Werneburg, I., Laurin, M., Koyabu, D., & Sanchez-Villagra, M. R. (2016). Evolution of organogenesis and the origin of altriciality in mammals. *Evolution & Development*, 18, 229-244. doi:10.1111/ede.12194
- Workman, A. D., Charvet, C. J., Clancy, B., Darlington, R. B., & Finlay, B. L. (2013). Modeling transformations of neurodevelopmental sequences across mammalian species. *Journal of Neuroscience*, 33, 7368-7383. doi:10.1523/JNEUROSCI.5746-12.2013
- Wourms, J. P. (1972). Developmental biology of annual fishes. I. Stages in the normal development of *Austrofundulus myersi* Dahl. *Journal of Experimental Zoology Part A: Ecological and Integrative Physiology*, 182, 143-167. doi:10.1002/jez.1401820202
- Yang, L., Sado, T., Vincent Hirt, M., Pasco-Viel, E., Arunachalam, M., Li, J., . . . Mayden, R. L. (2015). Phylogeny and polyploidy: resolving the classification of cyprinine fishes (Teleostei: Cypriniformes). *Molecular Phylogenetics and Evolution*, 85, 97-116. doi:10.1016/j.ympev.2015.01.014
- Zalina, I., Saad, C. R., Christianus, A., & Harmin, S. A. (2012). Induced breeding and embryonic development of climbing perch (*Anabas testudineus*, Bloch). *Journal of Fisheries and Aquatic Science*, 7, 291-306. doi.org/10.5567/ECOLOGY-IK.2013.8.14

# **Author contribution**

F.I. designed the study, performed the majority of the experiments, analyzed data and wrote the manuscript. T.M contributed to designing and conducting the simulation. T.M. and T.H. supervised the study and helped F.I. to write the manuscript with input from other people.

# **Competing interests**

The authors have no competing interests.

# **Figure Legends**

## **FIGURE 1 Temporal orders of developmental events in the 31 fish**

The temporal sequence of developmental events was extracted from the reference listed for each species. Abbreviations of developmental events are; bc: blood circulation, cfr: caudal fin ray, ep: eye pigmentation, es: embryonic shield, fs: first somite, h: hatch, hb: heart beat/pulsing, kv: kupffer's vesicle, le: lens or lens placode/primodium, mff: medial finfold, mo: mouth opening, olf: olfactory vesicle/pit/placode, oto: otolithes, ot: otic vesicle placode/primodium, op: optic vesicle/placode/primodium, pfb: pectoral fin bud, sw: swim bladder, tb: tail bud, tbr: three brain regionalization, and tl: tail lift from yolk. The ranks of missing data are marked by ?.

## **FIGURE 2 Phylogenetic relationships of the 31 fish**

The phylogenetic tree of the 31 fish examined in this study. The asterisk marks the anadromous fish, while all the others are freshwater fish. The numbers aside the branches indicate the divergent times (Mya). In some representative branches, the numbers of heterochronic shifts detected under acctran and deltran optimizations are shown in boxes.

### **FIGURE 3 Distribution of ranks of events in the developmental sequence**

The boxplot shows the statistical distribution (minimum, first quartile, median, third quartile, maximum and outliers) of normalized ranks for individual developmental events obtained from the extant in-group 30 fish data (a) and reconstructed ancestral developmental sequences by acctran (b) and deltran (c) optimizations. In all of the panels, the developmental events are horizontally aligned from left to right according to average ranks in the extant fish sequences. In the ancestral sequences (b, c), the average sequence is reversed between first somite (fs) and tail bud (tb), between heart beats (hb) and olfactory vesicle/pit/placode (olf), and between blood circulation (bc) and otolithes (oto). An additional inversion is observed between swim bladder (sb) and caudal fin rays (cfr) in the deltran optimization (c).

### **FIGURE 4 Rank changeability of individual developmental events**



The variation of the ranks is shown as the average value of pairwise rank distances, which are calculated from all the pairs of ancestral developmental sequences reconstructed under acctran (left) and deltran (right) optimizations. The events are arranged along the standard ontogenic time frame defined by the average developmental sequence in extant fish (Figure 2) from top to bottom. \*significant differences ( $P < 0.05$ ) by Mann-Whitney U-test when comparing the values of Kupffer's vesicle (kv) and three brain regionalization (tbr) and those of lens formation (le) and tail lift from yolk (tl).

## **FIGURE 5 Sequence orders of event pairs in extant developmental sequences**

The event sequence matrix represents all the pairwise combinations of developmental events. The number shows the percentage of the sequences in which the row event occurs later than the column event, and was calculated from the dataset of extant 30 fish excluding the missing event data. The individual cells are differently heatmap color-coded depending on the percentage.

## **FIGURE 6 Distribution of heterochronic shifts in the fish phylogeny**

(a,b) The relationship between the phylogenetic branch length and the number of herterochronic shifts detected from the extant and ancestral developmental sequences (black circle) and

theoretically estimated by simulation (open circle) under acctran (a) and deltran (b) optimizations. In the simulation, the branch length and the number of shifts are highly correlated (Spearman's rank correlation coefficients; 0.9995 (acctran), 0.9995 (deltran)). (c) The coefficient of variance for the number of heterochronic shifts in each branch. The black and open circles show the experimental and simulated values, respectively. The vertical bars indicate 95% confident intervals for the simulated value. The analysis was conducted with three different branch categories: all branches, and the branches shorter than 50 and 20 million years (Mys). (d) The number of branches with no heterochronic shifts calculated from experimental (black circle) and simulation data (open circle) in three different branch length categories. Vertical bars indicate 95% confident intervals of the simulated value. (e, f) The number of heterochronic shifts detected in the external (e) and internal (f) branches calculated from experimental (black circle) and simulation data (open circle). The branches are categorized into three groups according to their lengths. Vertical bars indicate 95% confident intervals of the simulated value.

## FIGURE

| Taxon                             | Common name              | Reference                      | Ranks of events |    |    |    |    |     |    |    |    |    |     |     |     |    |     |    |
|-----------------------------------|--------------------------|--------------------------------|-----------------|----|----|----|----|-----|----|----|----|----|-----|-----|-----|----|-----|----|
|                                   |                          |                                | es              | op | fs | tb | kv | tbr | ot | le | tl | hb | olf | mff | oto | bc | pfb | ep |
| <i>Amia calva</i>                 | Bowfins                  | Ballard, 1986                  | 1               | 2  | 2  | 2  | ?  | 3   | 4  | 5  | 5  | 5  | 5   | 6   | 8   | 7  | 7   | 10 |
| <i>Alosa sapidissima</i>          | American shad            | Shardo, 1995                   | 1               | 4  | 2  | 5  | ?  | 3   | 5  | 5  | 6  | 7  | 5   | 6   | 7   | 7  | 8   | 10 |
| <i>Catostomus commersoni</i>      | White sucker             | Long & Ballard, 1976           | 1               | 3  | 2  | 3  | 4  | 3   | 4  | 5  | 5  | 6  | 7   | 6   | 7   | 7  | 8   | 10 |
| <i>Danio rerio</i>                | Zebrafish                | Kimmel et al., 1995            | 1               | 4  | 3  | 2  | 4  | 5   | 5  | 6  | 5  | 8  | 7   | 7   | 7   | 9  | 9   | 11 |
| <i>Cyprinus carpio</i>            | Common carp              | Verma, 1970                    | 1               | 3  | 4  | ?  | 5  | 2   | 5  | 6  | 6  | 7  | 7   | 11  | 8   | 8  | 9   | 10 |
| <i>Carassius auratus</i>          | Minnows                  | Tsai et al., 2013              | 1               | 3  | 3  | 2  | 4  | 4   | 5  | 5  | 5  | 6  | 7   | 5   | ?   | ?  | 6   | 8  |
| <i>Barbodes gonionotus</i>        | Silver barb              | Basak et al., 2014             | 1               | 3  | 2  | 2  | ?  | 3   | 7  | 4  | 5  | 6  | ?   | 6   | ?   | 5  | 6   | 11 |
| <i>Heteropneustes fossilis</i>    | Stinging catfish         | Puvaneswari et al, 2009        | 1               | 2  | 2  | 2  | 4  | 3   | 6  | 4  | 4  | 5  | 5   | 4   | ?   | 7  | 9   | 8  |
| <i>Heterobranchius bidorsalis</i> | African catfish          | Olaniyi & Omitogbe, 2014       | 1               | 2  | 2  | 2  | 3  | 7   | 4  | 8  | 4  | 5  | 8   | ?   | 4   | 8  | ?   | 5  |
| <i>Oncorhynchus mykiss</i>        | Rainbow trout            | Ballard, 1973                  | 1               | 3  | 2  | ?  | 2  | 3   | 7  | 5  | 6  | 6  | 4   | 7   | 9   | 7  | 7   | 8  |
| <i>Salmo salar</i>                | Atlantic salmon          | Pelluet, 1944, Gorodilov, 1996 | 1               | 3  | 2  | 6  | 2  | ?   | 4  | 5  | ?  | 7  | 8   | 8   | 9   | 8  | 9   | 10 |
| <i>Galaxias maculatus</i>         | Common galaxias          | Benzie, 1968                   | ?               | 1  | 2  | 1  | 2  | 1   | 3  | 2  | 5  | 2  | 3   | 7   | 8   | ?  | 6   | 4  |
| <i>Gadus morhua</i>               | Atlantic cod             | Hall et al., 2004              | 1               | 2  | 1  | 3  | 3  | 3   | 4  | 6  | ?  | 7  | 5   | 4   | 5   | 8  | 8   | 9  |
| <i>Gobius niger</i>               | Black goby               | Ballard, 1969                  | 1               | 2  | 2  | 3  | 3  | 6   | 5  | 4  | 4  | 8  | ?   | 5   | 7   | 9  | 8   | 10 |
| <i>Leucopsarion petersii</i>      | Ice goby                 | Arakawa et al., 1999           | 1               | 3  | 3  | 2  | 3  | 4   | 5  | 6  | 5  | 7  | ?   | ?   | 9   | 8  | 10  | 8  |
| <i>Gasterosteus aculeatus</i>     | Three-spined stickleback | Swarup, 1958                   | 1               | 3  | 4  | ?  | 5  | 2   | 5  | 5  | ?  | 6  | 6   | ?   | 6   | 8  | 9   | 7  |
| <i>Stizostedion vitreum</i>       | Walleye                  | McElman & Balon, 1979          | 1               | 2  | 3  | 2  | 3  | 4   | 4  | 5  | 6  | 7  | 4   | 6   | 8   | 9  | 11  | 10 |
| <i>Channa striatus</i>            | Striped snakehead        | Marimuthu & Haniffa, 2007      | 1               | 2  | 2  | 2  | 4  | 3   | 3  | 4  | 4  | 5  | 5   | 4   | 6   | 5  | 7   | ?  |
| <i>Anabas testudineus</i>         | Climbing gouramies       | Zalina et al., 2012            | 1               | 3  | 4  | ?  | 2  | 4   | 4  | 5  | ?  | 6  | ?   | ?   | 7   | 7  | ?   | 10 |
| <i>Amphilophus xiloensis</i>      | Cichlids                 | Kratochwil et al., 2015        | 1               | 2  | 2  | 2  | ?  | 5   | 2  | 4  | 3  | 5  | ?   | ?   | ?   | 7  | 8   | 6  |
| <i>Cichlasoma dimerus</i>         | South American cichlids  | Mejide & Guerrero, 2000        | 1               | 4  | 3  | 2  | ?  | 5   | 5  | 5  | 6  | 5  | ?   | 8   | 6   | 6  | 9   | 8  |
| <i>Oreochromis niloticus</i>      | Nile tilapia             | Fujimura & Okada, 2007         | 1               | 3  | 2  | 3  | ?  | 4   | 5  | 6  | 5  | 6  | 6   | 7   | 8   | 8  | 8   | 9  |
| <i>Labetropheus trewavasae</i>    | Scrapemouth mbuna        | Balon, 1977                    | 1               | 2  | 4  | 3  | ?  | 2   | 3  | 5  | 5  | 6  | 11  | 9   | 5   | 7  | 9   | 8  |
| <i>Haplochromis piceatus</i>      | Victoria cichlids        | de Jong et al., 2009           | 1               | 2  | 2  | 4  | ?  | 4   | 3  | 4  | 5  | 5  | 4   | 6   | 6   | 6  | 7   | 7  |
| <i>Melanotaenia splendida</i>     | Eastern rainbow fish     | Humphrey et al., 2003          | 1               | 2  | 4  | 3  | 3  | ?   | 6  | 5  | 6  | 7  | ?   | 11  | 8   | 7  | 9   | 5  |
| <i>Adinia xenica</i>              | Diamond killfish         | Cunningham & Balon, 1985       | 1               | 2  | 3  | ?  | 3  | 2   | 3  | 5  | ?  | 6  | 8   | 9   | 4   | 7  | 8   | 9  |
| <i>Fundulus heteroclitus</i>      | Mummichog                | Armstrong & Swope Child, 1965  | 1               | 2  | 4  | ?  | 3  | 3   | 5  | 5  | 7  | 6  | 5   | ?   | 8   | 7  | 9   | 10 |
| <i>Xiphophorus maculatus</i>      | Southern platyfish       | Tavolga & Rugh                 | 1               | 2  | 2  | 4  | ?  | 3   | 3  | 5  | 4  | 5  | 6   | ?   | 8   | 6  | 5   | 7  |
| <i>Austrofundulus myersi</i>      | Rivulines                | Wourms, 1998                   | 1               | 4  | 3  | 2  | 2  | 5   | 6  | 7  | 10 | 7  | ?   | 11  | 9   | 8  | 9   | 10 |
| <i>Oryzias latipes</i>            | Japanese ricefish        | Iwamatsu & Hirata, 1984        | 1               | 3  | 4  | ?  | 2  | 5   | 4  | 6  | 9  | 7  | 13  | 12  | 8   | 8  | 10  | 11 |
| <i>Oryzias javanicus</i>          | Javanese ricefish        | Iwamatsu, 2004                 | 1               | 3  | 4  | ?  | 2  | 5   | 5  | 6  | 9  | 7  | 7   | ?   | 8   | 8  | 9   | 10 |

## FIGURE 1

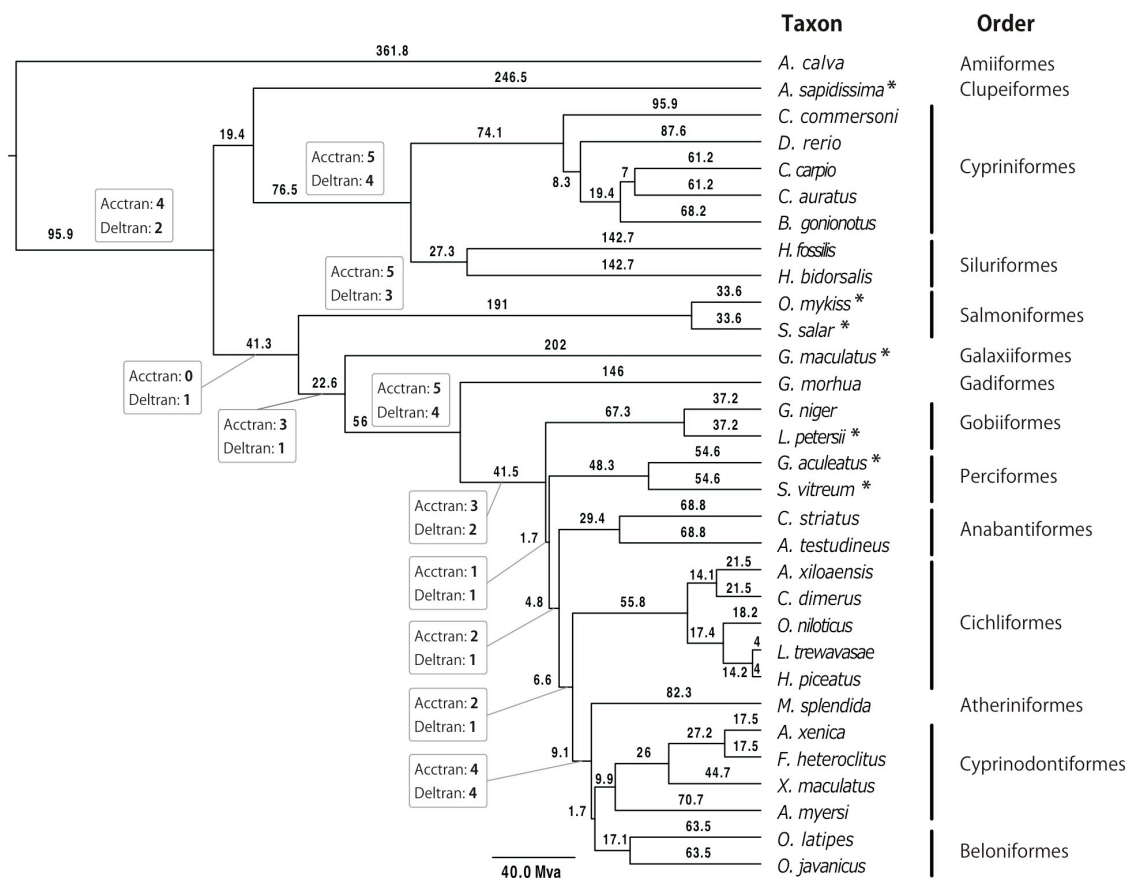

**FIGURE 2**

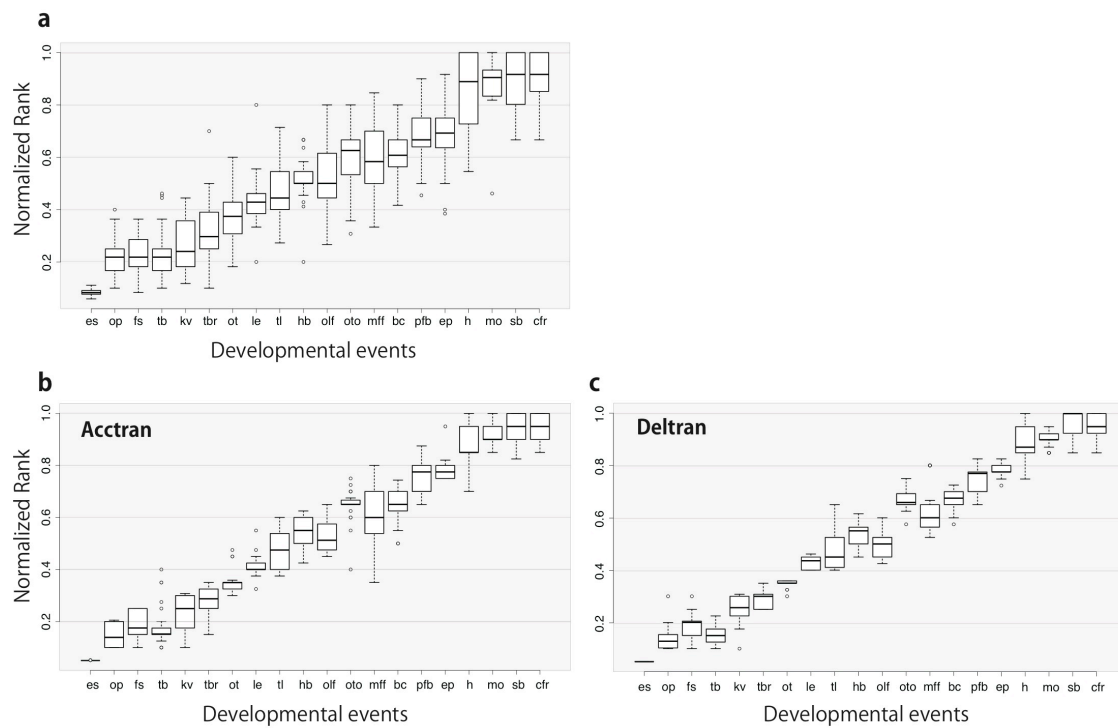

**FIGURE 3**

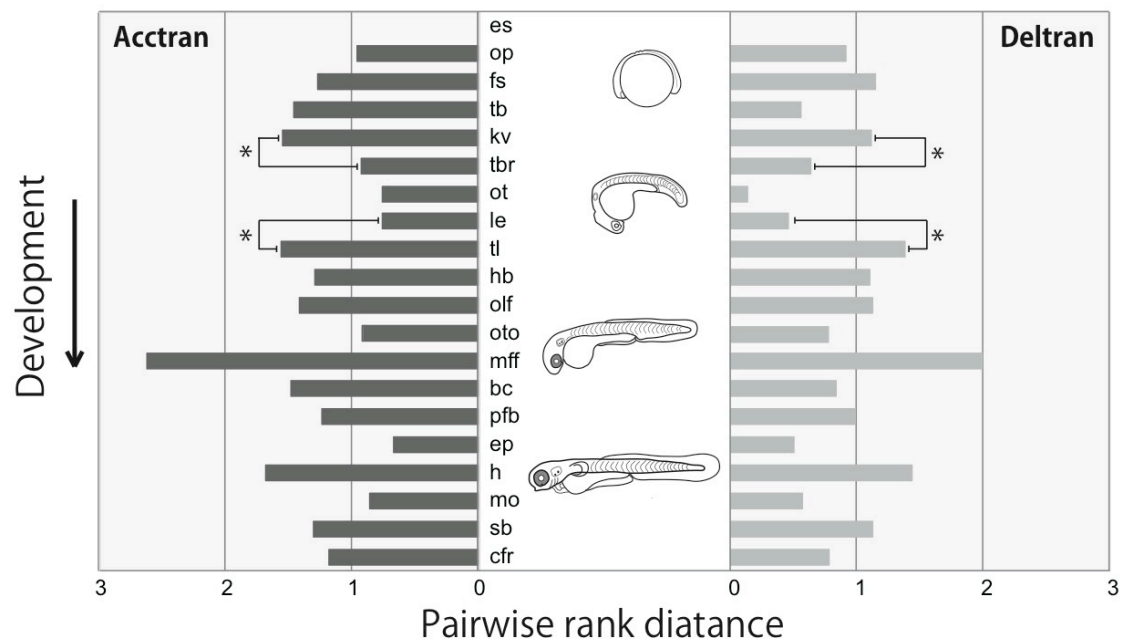

**FIGURE 4**

|     | es | op  | fs  | tb  | kv  | tbr | ot  | le  | tl  | hb  | olf | oto | mff | bc  | pfb | ep  | h   | mo  | sb  |
|-----|----|-----|-----|-----|-----|-----|-----|-----|-----|-----|-----|-----|-----|-----|-----|-----|-----|-----|-----|
| op  | 0% |     |     |     |     |     |     |     |     |     |     |     |     |     |     |     |     |     |     |
| fs  | 0% | 33% |     |     |     |     |     |     |     |     |     |     |     |     |     |     |     |     |     |
| tb  | 0% | 27% | 41% |     |     |     |     |     |     |     |     |     |     |     |     |     |     |     |     |
| kv  | 0% | 27% | 27% | 7%  |     |     |     |     |     |     |     |     |     |     |     |     |     |     |     |
| tbr | 0% | 11% | 21% | 15% | 35% |     |     |     |     |     |     |     |     |     |     |     |     |     |     |
| ot  | 0% | 0%  | 3%  | 14% | 5%  | 18% |     |     |     |     |     |     |     |     |     |     |     |     |     |
| le  | 0% | 0%  | 0%  | 5%  | 0%  | 7%  | 20% |     |     |     |     |     |     |     |     |     |     |     |     |
| tl  | 0% | 0%  | 0%  | 0%  | 0%  | 13% | 16% | 24% |     |     |     |     |     |     |     |     |     |     |     |
| hb  | 0% | 0%  | 0%  | 0%  | 0%  | 4%  | 13% | 3%  | 24% |     |     |     |     |     |     |     |     |     |     |
| olf | 0% | 0%  | 0%  | 0%  | 0%  | 0%  | 9%  | 14% | 39% | 32% |     |     |     |     |     |     |     |     |     |
| oto | 0% | 0%  | 0%  | 0%  | 0%  | 5%  | 9%  | 5%  | 0%  | 36% | 41% |     |     |     |     |     |     |     |     |
| mff | 0% | 0%  | 0%  | 0%  | 0%  | 4%  | 0%  | 12% | 14% | 23% | 20% | 37% |     |     |     |     |     |     |     |
| bc  | 0% | 0%  | 0%  | 0%  | 0%  | 0%  | 4%  | 0%  | 13% | 4%  | 15% | 40% | 32% |     |     |     |     |     |     |
| pfb | 0% | 0%  | 0%  | 0%  | 0%  | 0%  | 4%  | 0%  | 4%  | 0%  | 19% | 27% | 13% | 8%  |     |     |     |     |     |
| ep  | 0% | 0%  | 0%  | 0%  | 0%  | 4%  | 3%  | 3%  | 8%  | 3%  | 19% | 29% | 20% | 19% | 37% |     |     |     |     |
| h   | 0% | 0%  | 0%  | 0%  | 0%  | 4%  | 0%  | 3%  | 0%  | 0%  | 9%  | 9%  | 0%  | 7%  | 14% | 17% |     |     |     |
| mo  | 0% | 0%  | 0%  | 0%  | 0%  | 0%  | 0%  | 0%  | 0%  | 3%  | 5%  | 5%  | 4%  | 4%  | 4%  | 10% | 37% |     |     |
| sb  | 0% | 0%  | 0%  | 0%  | 0%  | 0%  | 0%  | 0%  | 0%  | 0%  | 0%  | 6%  | 0%  | 0%  | 5%  | 9%  | 39% | 48% |     |
| cfr | 0% | 0%  | 0%  | 0%  | 0%  | 0%  | 0%  | 0%  | 0%  | 0%  | 0%  | 0%  | 0%  | 0%  | 4%  | 4%  | 39% | 39% | 43% |

FIGURE 5

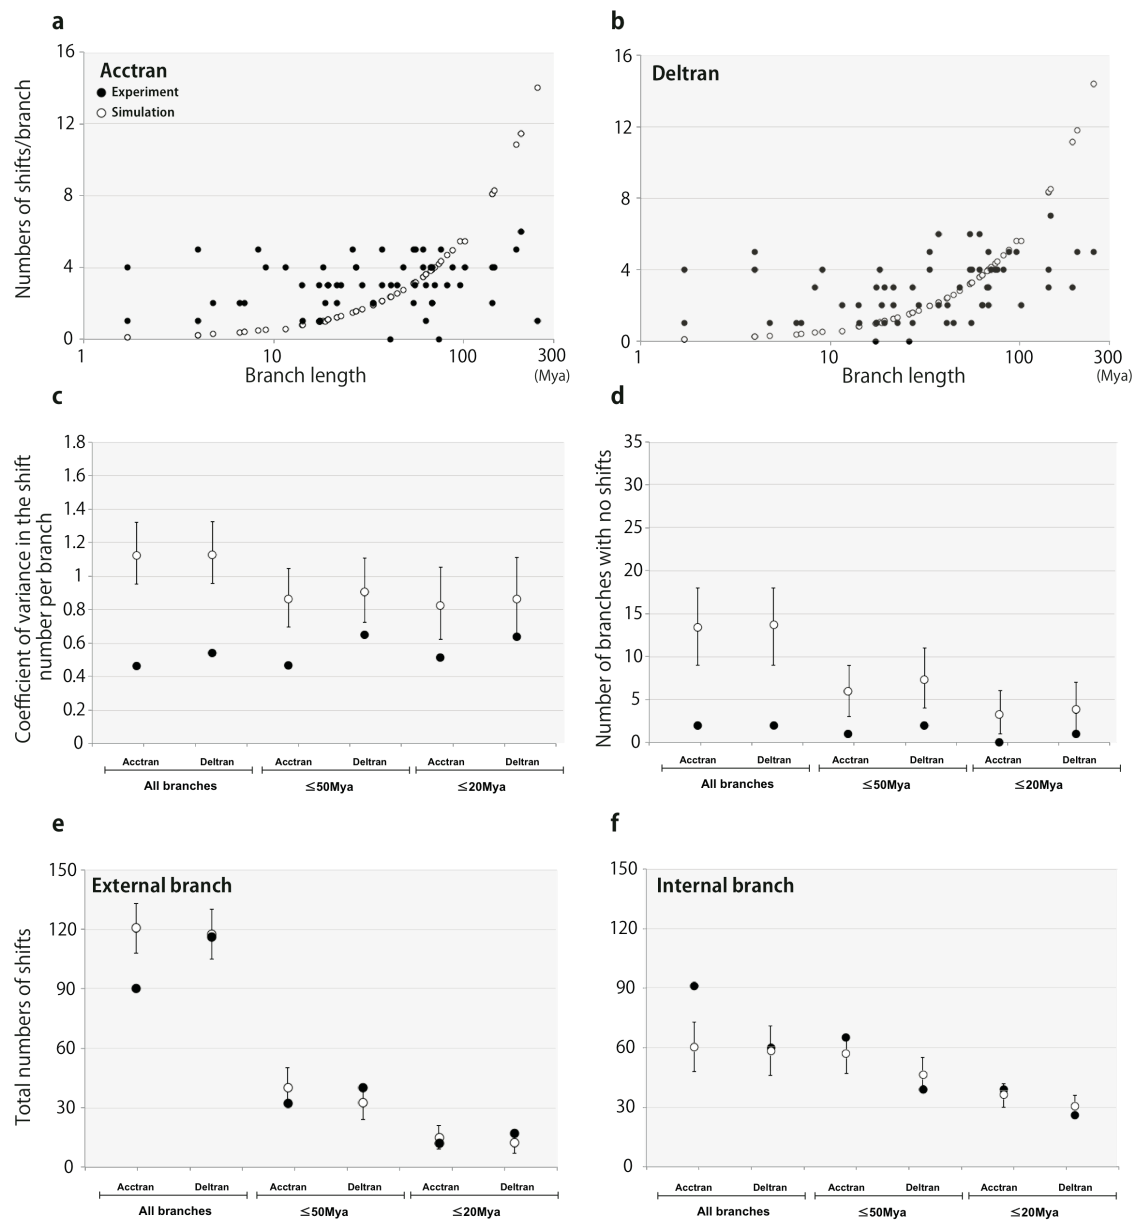

FIGURE 6
